# Supplementary material
Source: PubMed Central journal article supplement (PMC8702848)
Supplement: AJSLP-30-2115-s001.pdf [file AJSLP-30-2115-s001.pdf]

**Supplemental Material S1.** Final search strategies – scoping review.

| Database     | DateSearchRun   | Results     | UniqueResults |
|--------------|-----------------|-------------|---------------|
| Ovid MEDLINE | 20191203        | 1286        | 1274          |
| EMBASE       | 20191203        | 3120        | 1957          |
| CINAHL       | 20191203        | 1955        | 887           |
| ERIC         | 20191203        | 172         | 25            |
| PsycINFO     | 20191203        | 1540        | 400           |
| CochraneSR   | 20191203        | 3           | 0             |
| LLBA         | 20191203        | 883         | 123           |
| <b>Total</b> | <b>20191203</b> | <b>8959</b> | <b>4666</b>   |

**Ovid MEDLINE**

(exp Aphasia/ or exp Anomia/ or (aphasi\* or dysphasi\* or anomi\*).ti,ab,kw.) and (exp Behavior Therapy/ or exp Language Therapy/ or exp Speech Therapy/ or exp Speech-Language Pathology/ or Rehabilitation/ or exp Music Therapy/ or exp Psychotherapy, Group/ or Relaxation/ or Therapy, Computer-Assisted/ or (AAC or cueing strateg\* or errorless learning or group psychotherap\* or group therap\* or aphasia program\* or life participation approach or neurofeedback\* or orla or semantic cueing or semantic feature analysis or TUF or video model\* or virtual reality or ((aphasia or attention or behavior or behavioral or behavioural or behavioural or behavioural or behavioural or cognitive or communication or computer or computerised or constant or conversation or language or lexical or melodic or memory or multimodal or music or orthographic or phonological or naming or reading or repetition or response elaboration or script or self administered or semantic or sentence comprehension or speech or verb network strengthening or visual action or voice or word finding) adj2 (therap\* or intervention\* or rehabilitation or treatment\* or training))).ti,ab,kw,kf.)

limit 10 to yr="2009 -Current" (1286)

| <b>Ovid MEDLINE(R) ALL &lt;1946 to December 02, 2019&gt;</b> |                                                                                                                                                                                                                                                                                                                                                                                                                                                                                                                                                                                                                                                  |         |
|--------------------------------------------------------------|--------------------------------------------------------------------------------------------------------------------------------------------------------------------------------------------------------------------------------------------------------------------------------------------------------------------------------------------------------------------------------------------------------------------------------------------------------------------------------------------------------------------------------------------------------------------------------------------------------------------------------------------------|---------|
| Search                                                       | Strategy                                                                                                                                                                                                                                                                                                                                                                                                                                                                                                                                                                                                                                         | Results |
| 1                                                            | exp Aphasia/ or exp Anomia/                                                                                                                                                                                                                                                                                                                                                                                                                                                                                                                                                                                                                      | 12118   |
| 2                                                            | (aphasi* or dysphasi* or anomi*).ti,ab,kw.                                                                                                                                                                                                                                                                                                                                                                                                                                                                                                                                                                                                       | 16585   |
| 3                                                            | 1 or 2                                                                                                                                                                                                                                                                                                                                                                                                                                                                                                                                                                                                                                           | 19655   |
| 4                                                            | exp Behavior Therapy/ or exp Language Therapy/ or exp Speech Therapy/ or exp Speech-Language Pathology/ or Rehabilitation/ or exp Music Therapy/ or exp Psychotherapy, Group/ or Relaxation/ or Therapy, Computer-Assisted/                                                                                                                                                                                                                                                                                                                                                                                                                      | 130843  |
| 5                                                            | (AAC or cueing strateg* or errorless learning or group psychotherap* or group therap* or aphasia program* or life participation approach or neurofeedback* or orla or semantic cueing or semantic feature analysis or TUF or video model* or virtual reality).ti,ab,kw,kf.                                                                                                                                                                                                                                                                                                                                                                       | 23194   |
| 6                                                            | 6 ((aphasia or attention or behavior or behavioral or behavioral or behavioral or behavioural or behavioural or behavioural or behavioural or cognitive or communication or computer or computerised or constant or conversation or language or lexical or melodic or memory or multimodal or music or orthographic or phonological or naming or reading or repetition or response elaboration or script or self administered or semantic or sentence comprehension or speech or verb network strengthening or visual action or voice or word finding) adj2 (therap* or intervention* or rehabilitation or treatment* or training)).ti,ab,kw,kf. | 95278   |
| 7                                                            | 4 or 5 or 6                                                                                                                                                                                                                                                                                                                                                                                                                                                                                                                                                                                                                                      | 209863  |
| 8                                                            | 3 and 7                                                                                                                                                                                                                                                                                                                                                                                                                                                                                                                                                                                                                                          | 2439    |
| 9                                                            | limit 8 to yr="2009 -Current"                                                                                                                                                                                                                                                                                                                                                                                                                                                                                                                                                                                                                    | 1286    |

| <b>EMBASE</b>                    |                                                                                                                                                                                                                                                                                                                                                                                                                                                                                                                                                                                 |         |
|----------------------------------|---------------------------------------------------------------------------------------------------------------------------------------------------------------------------------------------------------------------------------------------------------------------------------------------------------------------------------------------------------------------------------------------------------------------------------------------------------------------------------------------------------------------------------------------------------------------------------|---------|
| <i>SR_Cavanaugh_Aphasia_2019</i> |                                                                                                                                                                                                                                                                                                                                                                                                                                                                                                                                                                                 |         |
| Search                           | Strategy                                                                                                                                                                                                                                                                                                                                                                                                                                                                                                                                                                        | Results |
| #9.                              | #3 AND #7 AND [2009-2020]/py                                                                                                                                                                                                                                                                                                                                                                                                                                                                                                                                                    | 3,102   |
| #8.                              | #3 AND #7                                                                                                                                                                                                                                                                                                                                                                                                                                                                                                                                                                       | 5,131   |
| #7.                              | #4 OR #5 OR #6                                                                                                                                                                                                                                                                                                                                                                                                                                                                                                                                                                  | 308,275 |
| #6.                              | ((aphasia OR attention OR behavior OR behavioral OR behavioural OR cognitive OR communication OR computer OR computerised OR constant OR conversation OR language OR lexical OR melodic OR memory OR multimodal OR music OR orthographic OR phonological OR naming OR reading OR repetition OR 'response elaboration' OR script OR 'self administered' OR semantic OR 'sentence comprehension' OR speech OR 'verb network strengthening' OR 'visual action' OR voice OR 'word finding') NEAR/2 (therap* OR intervention* OR rehabilitation OR treatment* OR training)):ti,ab,kw | 137,116 |
| #5.                              | aac:ti,ab,kw OR 'cueing strateg*':ti,ab,kw OR 'errorless learning':ti,ab,kw OR 'group psychotherap*':ti,ab,kw OR 'group therap*':ti,ab,kw OR 'aphasia program*':ti,ab,kw OR 'life participation approach':ti,ab,kw OR neurofeedback*':ti,ab,kw OR orla:ti,ab,kw OR 'semantic cueing':ti,ab,kw OR 'semantic feature analysis':ti,ab,kw OR tuf:ti,ab,kw OR 'video model*':ti,ab,kw OR 'virtual reality':ti,ab,kw                                                                                                                                                                  | 32,788  |
| #4.                              | 'behavior therapy'/exp OR 'cognitive behavioral therapy'/exp OR 'speech and language rehabilitation'/exp OR 'rehabilitation'/de OR 'music therapy'/exp OR 'group therapy'/exp OR                                                                                                                                                                                                                                                                                                                                                                                                | 192,359 |

|     |                                                             |        |
|-----|-------------------------------------------------------------|--------|
|     | 'relaxation training'/exp OR 'computer assisted therapy'/de |        |
| #3. | #1 OR #2                                                    | 35,772 |
| #2. | aphasi*:ti,ab,kw OR dysphasi*:ti,ab,kw OR anomi*:ti,ab,kw   | 26,306 |
| #1. | 'aphasia'/exp                                               | 29,472 |

| Search | Strategy                                                                                                                                                                                                                                                                                                                                                                                                                                                                                                                                                                                                                                                                                                                                                                                                                                                                                                                                                                                                                                                                                                                                                                                                                 | Results |
|--------|--------------------------------------------------------------------------------------------------------------------------------------------------------------------------------------------------------------------------------------------------------------------------------------------------------------------------------------------------------------------------------------------------------------------------------------------------------------------------------------------------------------------------------------------------------------------------------------------------------------------------------------------------------------------------------------------------------------------------------------------------------------------------------------------------------------------------------------------------------------------------------------------------------------------------------------------------------------------------------------------------------------------------------------------------------------------------------------------------------------------------------------------------------------------------------------------------------------------------|---------|
| S9     | S3 AND S7                                                                                                                                                                                                                                                                                                                                                                                                                                                                                                                                                                                                                                                                                                                                                                                                                                                                                                                                                                                                                                                                                                                                                                                                                | 1,955   |
| S8     | S3 AND S7                                                                                                                                                                                                                                                                                                                                                                                                                                                                                                                                                                                                                                                                                                                                                                                                                                                                                                                                                                                                                                                                                                                                                                                                                | 2,787   |
| S7     | S4 OR S5 OR S6                                                                                                                                                                                                                                                                                                                                                                                                                                                                                                                                                                                                                                                                                                                                                                                                                                                                                                                                                                                                                                                                                                                                                                                                           | 144,447 |
| S6     | TI ((aphasia OR attention OR behavior OR behavioral OR behavioral OR behavioral OR behavioural OR behavioural OR behavioural OR behavioural OR cognitive OR communication OR computer OR computerised OR constant OR conversation OR language OR lexical OR melodic OR memory OR multimodal OR music OR orthographic OR phonological OR naming OR reading OR repetition OR "response elaboration" OR script OR "self administered" OR semantic OR "sentence comprehension" OR speech OR "verb network strengthening" OR "visual action" OR voice OR "word finding") N2 (therap* OR intervention* OR rehabilitation OR treatment* OR training)) OR AB ((aphasia OR attention OR behavior OR behavioral OR behavioral OR behavioral OR behavioural OR behavioural OR behavioural OR behavioural OR cognitive OR communication OR computer OR computerised OR constant OR conversation OR language OR lexical OR melodic OR memory OR multimodal OR music OR orthographic OR phonological OR naming OR reading OR repetition OR "response elaboration" OR script OR "self administered" OR semantic OR "sentence comprehension" OR speech OR "verb network strengthening" OR "visual action" OR voice OR "word finding") N2 | 88,765  |

|    |                                                                                                                                                                                                                                                                                                                                                                                                                                                                                                                                                                                                                                                                                                                                                                                                                                                                      |        |
|----|----------------------------------------------------------------------------------------------------------------------------------------------------------------------------------------------------------------------------------------------------------------------------------------------------------------------------------------------------------------------------------------------------------------------------------------------------------------------------------------------------------------------------------------------------------------------------------------------------------------------------------------------------------------------------------------------------------------------------------------------------------------------------------------------------------------------------------------------------------------------|--------|
|    | (therap* OR intervention* OR rehabilitation OR treatment* OR training)) OR SU ((aphasia OR attention OR behavior OR behavioral OR behavioral OR behavioral OR behavioural OR behavioural OR behavioural OR behavioural OR cognitive OR communication OR computer OR computerised OR constant OR conversation OR language OR lexical OR melodic OR memory OR multimodal OR music OR orthographic OR phonological OR naming OR reading OR repetition OR "response elaboration" OR script OR "self administered" OR semantic OR "sentence comprehension" OR speech OR "verb network strengthening" OR "visual action" OR voice OR "word finding") N2 (therap* OR intervention* OR rehabilitation OR treatment* OR training))                                                                                                                                            |        |
| S5 | TI (AAC OR "cueing strateg*" OR "errorless learning" OR "group psychotherap*" OR "group therap*" OR "aphasia program*" OR "life participation approach" OR neurofeedback* OR orla OR "semantic cueing" OR "semantic feature analysis" OR TUF OR "video model*" OR "virtual reality") OR AB (AAC OR "cueing strateg*" OR "errorless learning" OR "group psychotherap*" OR "group therap*" OR "aphasia program*" OR "life participation approach" OR neurofeedback* OR orla OR "semantic cueing" OR "semantic feature analysis" OR TUF OR "video model*" OR "virtual reality") OR SU (AAC OR "cueing strateg*" OR "errorless learning" OR "group psychotherap*" OR "group therap*" OR "aphasia program*" OR "life participation approach" OR neurofeedback* OR orla OR "semantic cueing" OR "semantic feature analysis" OR TUF OR "video model*" OR "virtual reality") | 10,348 |
| S4 | (MH "Behavior Therapy+") OR (MH "Rehabilitation, Speech and Language+") OR (MH "Speech-Language Pathology") OR (MH "Speech-Language Pathologists") OR (MH "Rehabilitation") OR (MH "Music Therapy+") OR (MH "Psychotherapy, Group+") OR (MH "Relaxation") OR (MH "Therapy, Computer-Assisted")                                                                                                                                                                                                                                                                                                                                                                                                                                                                                                                                                                       | 89,900 |
| S3 | S1 OR S2                                                                                                                                                                                                                                                                                                                                                                                                                                                                                                                                                                                                                                                                                                                                                                                                                                                             | 7,117  |
| S2 | TI (aphasi* OR dysphasi* OR anomi*) OR AB (aphasi* OR dysphasi* OR anomi*) OR SU (aphasi* OR dysphasi* OR anomi*)                                                                                                                                                                                                                                                                                                                                                                                                                                                                                                                                                                                                                                                                                                                                                    | 7,117  |
| S1 | (MH "Aphasia+") OR (MH "Anomia")                                                                                                                                                                                                                                                                                                                                                                                                                                                                                                                                                                                                                                                                                                                                                                                                                                     | 5,492  |

| <b>ERIC</b>                      |                                                                                                                                                                                                                                                                                                                                                                                                                                                                                                                                                                                                                                                                                                                                                                                                                                                                                                                                                                                                                                                                                                                                                                                                                                                                                                                                                                                                                                                                                                                                                                                                                                                                                                                                                                                                                                                |         |
|----------------------------------|------------------------------------------------------------------------------------------------------------------------------------------------------------------------------------------------------------------------------------------------------------------------------------------------------------------------------------------------------------------------------------------------------------------------------------------------------------------------------------------------------------------------------------------------------------------------------------------------------------------------------------------------------------------------------------------------------------------------------------------------------------------------------------------------------------------------------------------------------------------------------------------------------------------------------------------------------------------------------------------------------------------------------------------------------------------------------------------------------------------------------------------------------------------------------------------------------------------------------------------------------------------------------------------------------------------------------------------------------------------------------------------------------------------------------------------------------------------------------------------------------------------------------------------------------------------------------------------------------------------------------------------------------------------------------------------------------------------------------------------------------------------------------------------------------------------------------------------------|---------|
| <i>SR_Cavanaugh_Aphasia_2019</i> |                                                                                                                                                                                                                                                                                                                                                                                                                                                                                                                                                                                                                                                                                                                                                                                                                                                                                                                                                                                                                                                                                                                                                                                                                                                                                                                                                                                                                                                                                                                                                                                                                                                                                                                                                                                                                                                |         |
| Search                           | Strategy                                                                                                                                                                                                                                                                                                                                                                                                                                                                                                                                                                                                                                                                                                                                                                                                                                                                                                                                                                                                                                                                                                                                                                                                                                                                                                                                                                                                                                                                                                                                                                                                                                                                                                                                                                                                                                       | Results |
| S9                               | S6 AND S7                                                                                                                                                                                                                                                                                                                                                                                                                                                                                                                                                                                                                                                                                                                                                                                                                                                                                                                                                                                                                                                                                                                                                                                                                                                                                                                                                                                                                                                                                                                                                                                                                                                                                                                                                                                                                                      | 172     |
| S8                               | S6 AND S7                                                                                                                                                                                                                                                                                                                                                                                                                                                                                                                                                                                                                                                                                                                                                                                                                                                                                                                                                                                                                                                                                                                                                                                                                                                                                                                                                                                                                                                                                                                                                                                                                                                                                                                                                                                                                                      | 348     |
| S7                               | S3 OR S4 OR S5                                                                                                                                                                                                                                                                                                                                                                                                                                                                                                                                                                                                                                                                                                                                                                                                                                                                                                                                                                                                                                                                                                                                                                                                                                                                                                                                                                                                                                                                                                                                                                                                                                                                                                                                                                                                                                 | 108,954 |
| S6                               | S1 OR S2                                                                                                                                                                                                                                                                                                                                                                                                                                                                                                                                                                                                                                                                                                                                                                                                                                                                                                                                                                                                                                                                                                                                                                                                                                                                                                                                                                                                                                                                                                                                                                                                                                                                                                                                                                                                                                       | 1,386   |
| S5                               | TI ((aphasia OR attention OR behavior OR behavioral OR behavioral OR behavioral OR behavioural OR behavioural OR behavioural OR behavioural OR cognitive OR communication OR computer OR computerised OR constant OR conversation OR language OR lexical OR melodic OR memory OR multimodal OR music OR orthographic OR phonological OR naming OR reading OR repetition OR "response elaboration" OR script OR "self administered" OR semantic OR "sentence comprehension" OR speech OR "verb network strengthening" OR "visual action" OR voice OR "word finding") N2 (therap* OR intervention* OR rehabilitation OR treatment* OR training)) OR AB ((aphasia OR attention OR behavior OR behavioral OR behavioral OR behavioral OR behavioural OR behavioural OR behavioural OR behavioural OR cognitive OR communication OR computer OR computerised OR constant OR conversation OR language OR lexical OR melodic OR memory OR multimodal OR music OR orthographic OR phonological OR naming OR reading OR repetition OR "response elaboration" OR script OR "self administered" OR semantic OR "sentence comprehension" OR speech OR "verb network strengthening" OR "visual action" OR voice OR "word finding") N2 (therap* OR intervention* OR rehabilitation OR treatment* OR training)) OR SU ((aphasia OR attention OR behavior OR behavioral OR behavioral OR behavioral OR behavioural OR behavioural OR behavioural OR behavioural OR cognitive OR communication OR computer OR computerised OR constant OR conversation OR language OR lexical OR melodic OR memory OR multimodal OR music OR orthographic OR phonological OR naming OR reading OR repetition OR "response elaboration" OR script OR "self administered" OR semantic OR "sentence comprehension" OR speech OR "verb network strengthening" OR "visual action" OR | 24,299  |

|    |                                                                                                                                                                                                                                                                                                                                                                                                                                                                                                                                                                                                                                                                                                                                                                                                                                                                      |        |
|----|----------------------------------------------------------------------------------------------------------------------------------------------------------------------------------------------------------------------------------------------------------------------------------------------------------------------------------------------------------------------------------------------------------------------------------------------------------------------------------------------------------------------------------------------------------------------------------------------------------------------------------------------------------------------------------------------------------------------------------------------------------------------------------------------------------------------------------------------------------------------|--------|
|    | voice OR "word finding") N2 (therap* OR intervention* OR rehabilitation OR treatment* OR training))                                                                                                                                                                                                                                                                                                                                                                                                                                                                                                                                                                                                                                                                                                                                                                  |        |
| S4 | TI (AAC OR "cueing strateg*" OR "errorless learning" OR "group psychotherap*" OR "group therap*" OR "aphasia program*" OR "life participation approach" OR neurofeedback* OR orla OR "semantic cueing" OR "semantic feature analysis" OR TUF OR "video model*" OR "virtual reality") OR AB (AAC OR "cueing strateg*" OR "errorless learning" OR "group psychotherap*" OR "group therap*" OR "aphasia program*" OR "life participation approach" OR neurofeedback* OR orla OR "semantic cueing" OR "semantic feature analysis" OR TUF OR "video model*" OR "virtual reality") OR SU (AAC OR "cueing strateg*" OR "errorless learning" OR "group psychotherap*" OR "group therap*" OR "aphasia program*" OR "life participation approach" OR neurofeedback* OR orla OR "semantic cueing" OR "semantic feature analysis" OR TUF OR "video model*" OR "virtual reality") | 4,042  |
| S3 | DE "Behavior Modification" OR DE "Desensitization" OR DE "Positive Behavior Supports" OR DE "Intervention" OR DE "Therapy" OR DE "Art Therapy" OR DE "Bibliotherapy" OR DE "Educational Therapy" OR DE "Group Therapy" OR DE "Music Therapy" OR DE "Occupational Therapy" OR DE "Physical Therapy" OR DE "Psychotherapy" OR DE "Speech Therapy" OR DE "Therapeutic Recreation" AND DE "Rehabilitation" OR DE "Rehabilitation Counseling" OR DE "Computer Assisted Instruction" OR DE "Intelligent Tutoring Systems"                                                                                                                                                                                                                                                                                                                                                  | 95,943 |
| S2 | TI (aphasi* OR dysphasi* OR anomi*) OR AB (aphasi* OR dysphasi* OR anomi*) OR SU (aphasi* OR dysphasi* OR anomi*)                                                                                                                                                                                                                                                                                                                                                                                                                                                                                                                                                                                                                                                                                                                                                    | 1,386  |
| S1 | DE "Aphasia"                                                                                                                                                                                                                                                                                                                                                                                                                                                                                                                                                                                                                                                                                                                                                                                                                                                         | 1,049  |

| <b>PsycINFO (Ovid)</b> |                                            |         |
|------------------------|--------------------------------------------|---------|
| Search                 | Strategy                                   | Results |
| 1                      | exp Aphasia/                               | 16738   |
| 2                      | (aphasi* or dysphasi* or anomi*).ti,ab,id. | 15540   |
| 3                      | 1 or 2                                     | 22552   |

|   |                                                                                                                                                                                                                                                                                                                                                                                                                                                                                                                                                                                                                                             |        |
|---|---------------------------------------------------------------------------------------------------------------------------------------------------------------------------------------------------------------------------------------------------------------------------------------------------------------------------------------------------------------------------------------------------------------------------------------------------------------------------------------------------------------------------------------------------------------------------------------------------------------------------------------------|--------|
| 4 | exp Behavior Therapy/ or exp Language Therapy/ or exp Speech Therapy/ or exp Speech-Language Pathology/ or Rehabilitation/ or exp Music Therapy/ or exp Group Psychotherapy/ or exp Relaxation Therapy/ or Relaxation/ or Computer Assisted Therapy/                                                                                                                                                                                                                                                                                                                                                                                        | 76276  |
| 5 | (AAC or cueing strateg* or errorless learning or group psychotherap* or group therap* or aphasia program* or life participation approach or neurofeedback* or orla or semantic cueing or semantic feature analysis or TUF or video model* or virtual reality).ti,ab,id.                                                                                                                                                                                                                                                                                                                                                                     | 28124  |
| 6 | ((aphasia or attention or behavior or behavioral or behavioral or behavioral or behavioural or behavioural or behavioural or behavioural or cognitive or communication or computer or computerised or constant or conversation or language or lexical or melodic or memory or multimodal or music or orthographic or phonological or naming or reading or repetition or response elaboration or script or self administered or semantic or sentence comprehension or speech or verb network strengthening or visual action or voice or word finding) adj2 (therap* or intervention* or rehabilitation or treatment* or training)).ti,ab,id. | 112289 |
| 7 | 4 or 5 or 6                                                                                                                                                                                                                                                                                                                                                                                                                                                                                                                                                                                                                                 | 176509 |
| 8 | 3 and 7                                                                                                                                                                                                                                                                                                                                                                                                                                                                                                                                                                                                                                     | 3087   |
| 9 | limit 8 to yr="2009 -Current"                                                                                                                                                                                                                                                                                                                                                                                                                                                                                                                                                                                                               | 1540   |

| <b>Cochrane Database of Systematic Reviews (Wiley)</b> |                                                       |         |
|--------------------------------------------------------|-------------------------------------------------------|---------|
| Search                                                 | Strategy                                              | Results |
| #1                                                     | MeSH descriptor: [Aphasia] explode all trees          | 383     |
| #2                                                     | MeSH descriptor: [Anomia] explode all trees           | 22      |
| #3                                                     | (aphasi* OR dysphasi* OR anomi*):ti,ab,kw             | 1758    |
| #4                                                     | #1 OR #2 OR #3                                        | 1758    |
| #5                                                     | MeSH descriptor: [Behavior Therapy] explode all trees | 15593   |
| #6                                                     | MeSH descriptor: [Language Therapy] explode all trees | 204     |



|     |                                                                                                                                                                                                                                                                                                                                                                                                                                                                                                                                                                                                                                                                                                                                                                                                                                                                                                                                                                             |       |
|-----|-----------------------------------------------------------------------------------------------------------------------------------------------------------------------------------------------------------------------------------------------------------------------------------------------------------------------------------------------------------------------------------------------------------------------------------------------------------------------------------------------------------------------------------------------------------------------------------------------------------------------------------------------------------------------------------------------------------------------------------------------------------------------------------------------------------------------------------------------------------------------------------------------------------------------------------------------------------------------------|-------|
| #7  | MeSH descriptor: [Speech Therapy] explode all trees                                                                                                                                                                                                                                                                                                                                                                                                                                                                                                                                                                                                                                                                                                                                                                                                                                                                                                                         | 253   |
| #8  | MeSH descriptor: [Speech-Language Pathology] explode all trees                                                                                                                                                                                                                                                                                                                                                                                                                                                                                                                                                                                                                                                                                                                                                                                                                                                                                                              | 68    |
| #9  | MeSH descriptor: [Rehabilitation] this term only                                                                                                                                                                                                                                                                                                                                                                                                                                                                                                                                                                                                                                                                                                                                                                                                                                                                                                                            | 307   |
| #10 | MeSH descriptor: [Music Therapy] explode all trees                                                                                                                                                                                                                                                                                                                                                                                                                                                                                                                                                                                                                                                                                                                                                                                                                                                                                                                          | 766   |
| #11 | MeSH descriptor: [Psychotherapy, Group] explode all trees                                                                                                                                                                                                                                                                                                                                                                                                                                                                                                                                                                                                                                                                                                                                                                                                                                                                                                                   | 3299  |
| #12 | MeSH descriptor: [Relaxation] this term only                                                                                                                                                                                                                                                                                                                                                                                                                                                                                                                                                                                                                                                                                                                                                                                                                                                                                                                                | 291   |
| #13 | MeSH descriptor: [Music Therapy] explode all trees                                                                                                                                                                                                                                                                                                                                                                                                                                                                                                                                                                                                                                                                                                                                                                                                                                                                                                                          | 766   |
| #14 | MeSH descriptor: [Therapy, Computer-Assisted] this term only                                                                                                                                                                                                                                                                                                                                                                                                                                                                                                                                                                                                                                                                                                                                                                                                                                                                                                                | 1254  |
| #15 | (AAC OR "cueing strateg*" OR "errorless learning" OR "group psychotherap*" OR "group therap*" OR "aphasia program*" OR "life participation approach" OR neurofeedback* OR orla OR "semantic cueing" OR "semantic feature analysis" OR TUF OR "video model*" OR "virtual reality"):ti,ab,kw 3695<br><br>#16 (aphasia OR attention OR behavior OR behavioral OR behavioral OR behavioral OR behavioural OR behavioural OR behavioural OR behavioural OR cognitive OR communication OR computer OR computerised OR constant OR conversation OR language OR lexical OR melodic OR memory OR multimodal OR music OR orthographic OR phonological OR naming OR reading OR repetition OR "response elaboration" OR script OR "self administered" OR semantic OR "sentence comprehension" OR speech OR "verb network strengthening" OR "visual action" OR voice OR "word finding" ):ti,ab,kw NEAR/2 (therap* OR intervention* OR rehabilitation OR treatment* OR training):ti,ab,kw | 51253 |
| #17 | #5 OR #6 OR #7 OR #8 OR #9 OR #10 OR #11 OR #12 OR #13 OR #14 OR #15 OR #16                                                                                                                                                                                                                                                                                                                                                                                                                                                                                                                                                                                                                                                                                                                                                                                                                                                                                                 | 59133 |
| #18 | #4 AND #17 with Cochrane Library publication date Between Jan 2009 and Dec 2019                                                                                                                                                                                                                                                                                                                                                                                                                                                                                                                                                                                                                                                                                                                                                                                                                                                                                             | 736   |

| <b>Linguistics and Language Behavior Abstracts (LLBA)</b> |                                                                                                                                                                                                                                                                                                                                                                                                                                                                                                                                                                                                                                                                                                                                                                                                                                                                                                                                                                                                                                                                                                                                                                                                                                                                                                                                                                                                                                                                                                                                                                                                                                                                                                                                                                                                                                                                                                                                                                                                                                                                                                                                                                                                                                                                                                                                                                                                               |         |
|-----------------------------------------------------------|---------------------------------------------------------------------------------------------------------------------------------------------------------------------------------------------------------------------------------------------------------------------------------------------------------------------------------------------------------------------------------------------------------------------------------------------------------------------------------------------------------------------------------------------------------------------------------------------------------------------------------------------------------------------------------------------------------------------------------------------------------------------------------------------------------------------------------------------------------------------------------------------------------------------------------------------------------------------------------------------------------------------------------------------------------------------------------------------------------------------------------------------------------------------------------------------------------------------------------------------------------------------------------------------------------------------------------------------------------------------------------------------------------------------------------------------------------------------------------------------------------------------------------------------------------------------------------------------------------------------------------------------------------------------------------------------------------------------------------------------------------------------------------------------------------------------------------------------------------------------------------------------------------------------------------------------------------------------------------------------------------------------------------------------------------------------------------------------------------------------------------------------------------------------------------------------------------------------------------------------------------------------------------------------------------------------------------------------------------------------------------------------------------------|---------|
| Search                                                    | Strategy                                                                                                                                                                                                                                                                                                                                                                                                                                                                                                                                                                                                                                                                                                                                                                                                                                                                                                                                                                                                                                                                                                                                                                                                                                                                                                                                                                                                                                                                                                                                                                                                                                                                                                                                                                                                                                                                                                                                                                                                                                                                                                                                                                                                                                                                                                                                                                                                      | Results |
| S1                                                        | <p>((MAINSUBJECT.EXPLODE("Aphasia") OR<br/> MAINSUBJECT.EXPLODE("Anomia")) OR (ab(aphasi* OR<br/> dysphasi* OR anomi*) OR ti(aphasi* OR dysphasi* OR anomi*)))<br/> AND ((MAINSUBJECT.EXPLODE("Language Therapy") OR<br/> MAINSUBJECT.EXPLODE("Speech Therapy") OR<br/> MAINSUBJECT.EXPLODE("Psychotherapy")) OR (ti(AAC OR<br/> "cueing strateg*" OR "errorless learning" OR "group psychotherap*"<br/> OR "group therap*" OR "aphasia program*" OR "life participation<br/> approach" OR neurofeedback* OR orla OR "semantic cueing" OR<br/> "semantic feature analysis" OR TUF OR "video model*" OR "virtual<br/> reality") or ab(AAC OR "cueing strateg*" OR "errorless learning"<br/> OR "group psychotherap*" OR "group therap*" OR "aphasia<br/> program*" OR "life participation approach" OR neurofeedback* OR<br/> orla OR "semantic cueing" OR "semantic feature analysis" OR TUF<br/> OR "video model*" OR "virtual reality"))) OR (ti((aphasia OR<br/> attention OR behavior OR behavioral OR behavioral OR<br/> behavioral OR behavioural OR behavioural OR behavioural OR<br/> behavioural OR cognitive OR communication OR computer OR<br/> computerised OR constant OR conversation OR language OR<br/> lexical OR melodic OR memory OR multimodal OR music OR<br/> orthographic OR phonological OR naming OR reading OR<br/> repetition OR "response elaboration" OR script OR "self<br/> administered" OR semantic OR "sentence comprehension" OR<br/> speech OR "verb network strengthening" OR "visual action" OR<br/> voice OR "word finding" ) NEAR/2 (therap* OR intervention* OR<br/> rehabilitation OR treatment* OR training))) OR ab((aphasia OR<br/> attention OR behavior OR behavioral OR behavioral OR<br/> behavioral OR behavioural OR behavioural OR behavioural OR<br/> behavioural OR cognitive OR communication OR computer OR<br/> computerised OR constant OR conversation OR language OR<br/> lexical OR melodic OR memory OR multimodal OR music OR<br/> orthographic OR phonological OR naming OR reading OR<br/> repetition OR "response elaboration" OR script OR "self<br/> administered" OR semantic OR "sentence comprehension" OR<br/> speech OR "verb network strengthening" OR "visual action" OR<br/> voice OR "word finding" ) NEAR/2 (therap* OR intervention* OR<br/> rehabilitation OR treatment* OR training)))) AND pd(20090101-<br/> 20201231)</p> | 883     |
