# Supplementary material
Source: PubMed Central journal article supplement (PMC8702848)
Supplement: AJSLP-30-2115-s002.pdf [file AJSLP-30-2115-s002.pdf]

**Supplemental Material S2.** Citation from Distiller SR.

- Abel, S., Weiller, C., Huber, W., & Willmes, K. (2014). Neural underpinnings for model-oriented therapy of aphasic word production. *Neuropsychologia*, 57, 154-65.
- Ablinger, I., von Heyden, K., Vorstius, C., Halm, K., Huber, W., & Radach, R. (2014). An eye movement based reading intervention in lexical and segmental readers with acquired dyslexia. *Neuropsychological Rehabilitation*, 24(6), 833-67.
- Adelt, A., Hanne, S., & Stadie, N. (2018). Treatment of sentence comprehension and production in aphasia: is there cross-modal generalisation? *Neuropsychological Rehabilitation*, 28(6), 937-965.
- Adrian, J. A., Gonzalez, M., Buiza, J. J., & Sage, K. (2011). Extending the use of Spanish Computer-assisted Anomia Rehabilitation Program (CARP-2) in people with aphasia. *Journal of Communication Disorders*, 44(6), 666-77.
- Agostini, M., Garzon, M., Benavides-Varela, S., De Pellegrin, S., Bencini, G., Rossi, G., Rosadoni, S., Mancuso, M., Turolla, A., Meneghello, F., & Tonin, P. (2014). Telerehabilitation in poststroke anomia. *BioMed Research International*, 2014, 706909.
- Akanuma, K., Meguro, K., Satoh, M., Tashiro, M., & Itoh, M. (2016). Singing can improve speech function in aphasics associated with intact right basal ganglia and preserve right temporal glucose metabolism: Implications for singing therapy indication. *International Journal of Neuroscience*, 126(1), 39-45.
- Al-Shdifat, K. G., Sarsak, J., & Ghareeb, F. A. (2018). Exploring the efficacy of melodic intonation therapy with Broca's aphasia in Arabic. *South African Journal of Communication Disorders - die Suid-Afrikaanse Tydskrif vir Kommunikasieafwykings*, 65(1), e1-e8.
- Ali, N., Rafi, M. S., Ghayas Khan, M. S., & Mahfooz, U. (2018). The effectiveness of script training to restore lost communication in a patient with Broca's aphasia. *JPMA - Journal of the Pakistan Medical Association*, 68(7), 1070-1075.
- Altman, C., Goral, M., & Levy, E. S. (2012). Integrated narrative analysis in multilingual aphasia: The relationship among narrative structure, grammaticality, and fluency. *Aphasiology*, 26(8), 1029-1052.
- Altmann, L. J., Hazamy, A. A., Carvajal, P. J., Benjamin, M., Rosenbek, J. C., & Crosson, B. (2014). Delayed Stimulus-Specific Improvements in Discourse Following Anomia Treatment Using an Intentional Gesture. *Journal of Speech, Language, & Hearing Research*, 57(2), 439-54.
- Ansaldo, A. I., Saidi, L. G., & Ruiz, A. (2010). Model-driven intervention in bilingual aphasia: Evidence from a case of pathological language mixing. *Aphasiology*, 24(2), 309-324.
- Antonucci, S. M. (2009). Use of semantic feature analysis in group aphasia treatment. *Aphasiology*, 23(7/8), 854-866.
- Asha, N. J., & Kamrujjaman, M. (2019). Cueing Hierarchy Is an Effective Language Stimulator Treatment Technique of Language Disorder for Patients with Anomic Aphasia. *Dubai Medical Journal*, 2(2), 46-49.
- Attard, M., Rose, M., & Lanyon, L. (2012). The comparative effects of multi-modality aphasia therapy and constraint-induced aphasia therapy-plus treatments for severe chronic Broca's aphasia: A pilot study. *International Journal of Stroke*, 7, 69.
- Avent, J., Patterson, J., Lu, A., & Small, K. (2009). Reciprocal scaffolding treatment: A person with aphasia as clinical teacher. *Aphasiology*, 23(1), 110-119.
- Bailey, D. J., Nessler, C., Berggren, K. N., & Wambaugh, J. L. (2019). An Aphasia Treatment for Verbs With Low Concreteness: A Pilot Study. *American Journal of Speech-Language Pathology*. Advance online publication. [https://doi.org/10.1044/2019\\_AJSLP-18-0257](https://doi.org/10.1044/2019_AJSLP-18-0257)
- Ball, A. L., de Riesthal, M., Breeding, V. E., & Mendoza, D. E. (2011). Modified ACT and CART in severe aphasia. *Aphasiology*, 25(6-7), 836-848.
- Barbieri, E., Mack, J., Chiappetta, B., Europa, E., & Thompson, C. K. (2019). Recovery of offline and online sentence processing in aphasia: Language and domain-general network neuroplasticity. *Cortex*, 120, 394-418.
- Barr, P., Biedermann, B., Tainturier, M. J., Kohnen, S., & Nickels, L. (2019). Too harts, won sole: Using dysgraphia treatment to address homophone representation. *Neuropsychological Rehabilitation*. Advance online publication. <https://doi.org/10.1080/09602011.2019.1629302>

- Bazzini, A., Zonca, G., Craca, A., Cafforio, E., Cellamare, F., Guarnaschelli, C., Felicetti, G., & Luzzatti, C. (2012). Rehabilitation of argument structure deficits in aphasia. *Aphasiology*, *26*(12), 1440-1460.
- Beeke, S., Beckley, F., Johnson, F., Heilemann, C., Edwards, S., Maxim, J., & Best, W. (2015). Conversation focused aphasia therapy: investigating the adoption of strategies by people with agrammatism. *Aphasiology*, *29*(3), 355-377.
- Beeson, P. M., Higginson, K., & Rising, K. (2013). Writing treatment for aphasia: a texting approach. *Journal of Speech, Language, & Hearing Research*, *56*(3), 945-55.
- Behrns, I., Hartelius, L., & Wengelin, (2009). Aphasia and computerised writing aid supported treatment. *Aphasiology*, *23*(10), 1276-1294.
- Benjamin, M. L., Towler, S., Garcia, A., Park, H., Sudhyadhom, A., Harnish, S., McGregor, K. M., Zlatar, Z., Reilly, J. J., Rosenbek, J. C., Gonzalez Rothi, L. J., & Crosson, B. (2014). A Behavioral Manipulation Engages Right Frontal Cortex During Aphasia Therapy. *Neurorehabilitation & Neural Repair*, *28*(6), 545-53.
- Best, W., Greenwood, A., Grassly, J., Herbert, R., Hickin, J., & Howard, D. (2013). Aphasia rehabilitation: does generalisation from anomia therapy occur and is it predictable? A case series study. *Cortex*, *49*(9), 2345-57.
- Best, W., Maxim, J., Heilemann, C., Beckley, F., Johnson, F., Edwards, S. I., Howard, D., & Beeke, S. (2016). Conversation Therapy with People with Aphasia and Conversation Partners using Video Feedback: A Group and Case Series Investigation of Changes in Interaction. *Frontiers in Human Neuroscience*, *10*, 562.
- Bilda, K. (2011). Video-based conversational script training for aphasia: A therapy study. *Aphasiology*, *25*(2), 191-201.
- Biran, M., & Fisher, S. (2015). Structured treatment can improve predicate argument structure impairment. *Aphasiology*, *29*(1), 29-56.
- Bitan, T., Simic, T., Saverino, C., Jones, C., Glazer, J., Collela, B., Wiseman-Hakes, C., Green, R., & Rochon, E. (2018). Changes in Resting-State Connectivity following Melody-Based Therapy in a Patient with Aphasia. *Neural Plasticity*, *2018*, 6214095.
- Bonifazi, S., Tomaiuolo, F., Alton, G., Ceravolo, M. G., Provinciali, L., & Marangolo, P. (2013). Action observation as a useful approach for enhancing recovery of verb production: new evidence from aphasia. *European journal of physical & rehabilitation medicine*, *49*(4), 473-81.
- Boo, M., & Rose, M. L. (2011). The efficacy of repetition, semantic, and gesture treatments for verb retrieval and use in Broca's aphasia. *Aphasiology*, *25*(2), 154-175.
- Bose, A. (2013). Phonological therapy in jargon aphasia: effects on naming and neologisms. *International Journal of Language & Communication Disorders*, *48*(5), 582-95.
- Bose, A., Hobler, F., & Saddy, D. (2019). Deciphering the mechanisms of phonological therapy in jargon aphasia. *International Journal of Language & Communication Disorders*, *54*(1), 123-142.
- Breier, J. I., Juranek, J., Maher, L. M., Schmadeke, S., Men, D., & Papanicolaou, A. C. (2009). Behavioral and neurophysiologic response to therapy for chronic aphasia. *Archives of Physical Medicine & Rehabilitation*, *90*(12), 2026-33.
- Breier, J. I., Randle, S., Maher, L. M., & Papanicolaou, A. C. (2010). Changes in maps of language activity activation following melodic intonation therapy using magnetoencephalography: two case studies. *Journal of Clinical & Experimental Neuropsychology: Official Journal of the International Neuropsychological Society*, *32*(3), 309-14.
- Bruce, C., & Newton, C. (2019). 'What's cooking?' A comparison of an activity-oriented and a table-top programme of therapy on the language performance of people with aphasia. *International Journal of Language & Communication Disorders*, *54*(3), 430-443.
- Capilouto, G., & Wright, H. H. (2009). Scripting information components to improve narrative discourse performance. *Journal of Medical Speech-Language Pathology*, *17*(2), 99-110.
- Carragher, M., Sage, K., & Conroy, P. (2013). The effects of verb retrieval therapy for people with non-fluent aphasia: evidence from assessment tasks and conversation. *Neuropsychological Rehabilitation*, *23*(6), 846-87.
- Carragher, M., Sage, K., & Conroy, P. (2015). Outcomes of treatment targeting syntax production in people with Broca's-type aphasia: evidence from psycholinguistic assessment tasks and everyday conversation. *International Journal of Language & Communication Disorders*, *50*(3), 322-36.

- Caute, A., & Woolf, C. (2016). Using voice recognition software to improve communicative writing and social participation in an individual with severe acquired dysgraphia: an experimental single-case therapy study. *Aphasiology*, *30*(2-3), 245-268.
- Caute, A., Woolf, C., Wilson, S., Stokes, C., Monnelly, K., Cruice, M., Bacon, K., & Marshall, J. (2019). Technology-Enhanced Reading Therapy for People With Aphasia: Findings From a Quasirandomized Waitlist Controlled Study. *Journal of Speech, Language, & Hearing Research*. Advance online publication. [https://doi.org/10.1044/2019\\_JSLHR-L-18-0484](https://doi.org/10.1044/2019_JSLHR-L-18-0484)
- Chen, W. L., Ye, Q., Zhang, S. C., Xia, Y., Yang, X., Yuan, T. F., Shan, C. L., & Li, J. A. (2019). Aphasia rehabilitation based on mirror neuron theory: a randomized-block-design study of neuropsychology and functional magnetic resonance imaging. *Neural Regeneration Research*, *14*(6), 1004-1012.
- Chen, W., Ye, Q., Ji, X., Zhang, S., Yang, X., Zhou, Q., Cong, F., Chen, W., Zhang, X., Zhang, B., Xia, Y., Yuan, T. F., & Shan, C. (2015). Mirror neuron system based therapy for aphasia rehabilitation. *Frontiers in Psychology*, *6*, 1665.
- Cherney, L. R. (2010). Oral reading for language in aphasia (ORLA): evaluating the efficacy of computer-delivered therapy in chronic nonfluent aphasia. *Topics in Stroke Rehabilitation*, *17*(6), 423-31.
- Cherney, L. R., Braun, E. J., Lee, J. B., Kocherginsky, M., & Van Vuuren, S. (2019). Optimising recovery in aphasia: Learning following exposure to a single dose of computer-based script training. *International Journal of Speech-language Pathology*, *21*(5), 448-458.
- Cherney, L. R., Kaye, R. C., & van Vuuren, S. (2014). Acquisition and maintenance of scripts in aphasia: a comparison of two cuing conditions. *American Journal of Speech-Language Pathology*, *23*(2), S343-60.
- Choe, Y. K., Foster, T., Asselin, A., LeVander, M., & Baird, J. (2017). Cognitive-linguistic effort in multidisciplinary stroke rehabilitation: Decreasing vs. increasing cues for word retrieval. *Neuropsychological Rehabilitation*, *27*(3), 318-348.
- Choe, Y. K., & Stanton, K. (2011). The effect of visual cues provided by computerised aphasia treatment. *Aphasiology*, *25*(9), 983-997.
- Choe, Yu-kyong, Azuma, Tamiko, & Mathy, Pamela (2010). The use of computers and augmentative and alternative communication devices in independent naming practice: Three single-case studies. *Journal of Medical Speech-Language Pathology*, *18*(2), 12-24.
- Conlon, E. L., Braun, E. J., Babbitt, E. M., & Cherney, L. R. (2019). Treatment Fidelity Procedures for an Aphasia Intervention Within a Randomized Controlled Trial: Design, Feasibility, and Results. *American Journal of Speech-Language Pathology*. Advance online publication. [https://doi.org/10.1044/2019\\_AJSLP-CAC48-18-0227](https://doi.org/10.1044/2019_AJSLP-CAC48-18-0227)
- Conner, P. S., Goral, M., Anema, I., Borodkin, K., Haendler, Y., Knoph, M., Mustelier, C., Paluska, E., Melnikova, Y., & Moeyaert, M. (2018). The role of language proficiency and linguistic distance in cross-linguistic treatment effects in aphasia. *Clinical Linguistics & Phonetics*, *32*(8), 739-757.
- Conroy, P., Sage, K., & Lambon Ralph, M. A. (2009). A comparison of word versus sentence cues as therapy for verb naming in aphasia. *Aphasiology*, *23*(4), 462-482.
- Conroy, P., Sage, K., & Lambon Ralph, M. A. (2009). Errorless and errorful therapy for verb and noun naming in aphasia. *Aphasiology*, *23*(11), 1311-1337.
- Conroy, P., Sage, K., & Lambon Ralph, M. A. (2009). The effects of decreasing and increasing cue therapy on improving naming speed and accuracy for verbs and nouns in aphasia. *Aphasiology*, *23*(6), 707-730.
- Conroy, P., Sage, K., & Ralph, M. L. (2009). Improved vocabulary production after naming therapy in aphasia: can gains in picture naming generalize to connected speech? *International Journal of Language & Communication Disorders*, *44*(6), 1036-62.
- Conroy, P., & Scowcroft, J. (2012). Decreasing cues for a dynamic list of noun and verb naming targets: a case-series aphasia therapy study. *Neuropsychological Rehabilitation*, *22*(2), 295-318.
- Conroy, P., Sotiropoulou Drosopoulou, C., Humphreys, G. F., Halai, A. D., & Lambon Ralph, M. A. (2018). Time for a quick word? The striking benefits of training speed and accuracy of word retrieval in post-stroke aphasia. *Brain*, *141*(6), 1815-1827.

- Corsten, Sabine, Konradi, Jürgen, Schimpf, Erika J., Hardering, Friedericke, & Keilmann, Annerose (2014). Improving quality of life in aphasia—Evidence for the effectiveness of the biographic-narrative approach. *Aphasiology*, 28(4), 440-452.
- Cortese, M. D., Riganello, F., Arcuri, F., Pignataro, L. M., & Buglione, I. (2015). Rehabilitation of aphasia: application of melodic-rhythmic therapy to Italian language. *Frontiers in Human Neuroscience*, 9, 520.
- Croft, S., Marshall, J., Pring, T., & Hardwick, M. (2011). Therapy for naming difficulties in bilingual aphasia: which language benefits? *International Journal of Language & Communication Disorders*, 46(1), 48-62.
- Crosson, B., Moore, A. B., McGregor, K. M., Chang, Y. L., Benjamin, M., Gopinath, K., Sherod, M. E., Wierenga, C. E., Peck, K. K., Briggs, R. W., Rothi, L. J., & White, K. D. (2009). Regional changes in word-production laterality after a naming treatment designed to produce a rightward shift in frontal activity. *Brain & Language*, 111(2), 73-85.
- Curtis, S., Nicholas, M. L., Pittmann, R., & Zipse, L. (2019). Tap your hand if you feel the beat: differential effects of tapping in melodic intonation therapy. *Aphasiology*, 34(5), 580-602.
- Daumüller, M., & Goldenberg, G. (2010). Therapy to improve gestural expression in aphasia: a controlled clinical trial. *Clinical Rehabilitation*, 24(1), 55-65.
- de Jong-Hagelstein, M., van de Sandt-Koenderman, W. M., Prins, N. D., Dippel, D. W., Koudstaal, P. J., & Visch-Brink, E. G. (2011). Efficacy of early cognitive-linguistic treatment and communicative treatment in aphasia after stroke: a randomised controlled trial (RATS-2). *Journal of Neurology, Neurosurgery & Psychiatry*, 82(4), 399-404.
- De Luca, R., Aragona, B., Leonardi, S., Torrisi, M., Galletti, B., Galletti, F., Accorinti, M., Bramanti, P., De Cola, M. C., & Calabro, R. S. (2018). Computerized Training in Poststroke Aphasia: What About the Long-Term Effects? A Randomized Clinical Trial. *Journal of Stroke & Cerebrovascular Diseases*, 27(8), 2271-2276.
- Dechene, L., Tousignant, M., Boissy, P., Macoir, J., Heroux, S., Hamel, M., Briere, S., & Page, C. (2011). Simulated in-home teletreatment for anomia. *International Journal of Telerehabilitation*, 3(2), 3-10.
- DeDe, G., Hoover, E., & Maas, E. (2019). Two to Tango or the More the Merrier? A Randomized Controlled Trial of the Effects of Group Size in Aphasia Conversation Treatment on Standardized Tests. *Journal of Speech, Language, & Hearing Research*, 62(5), 1437-1451.
- DeLong, C., Nessler, C., Wright, S., & Wambaugh, J. (2015). Semantic Feature Analysis: Further Examination of Outcomes. *American Journal of Speech-Language Pathology*, 24(4), S864-79.
- Des Roches, C. A., Vallila-Rohter, S., Villard, S., Tripodis, Y., Caplan, D., & Kiran, S. (2016). Evaluating Treatment and Generalization Patterns of Two Theoretically Motivated Sentence Comprehension Therapies. *American Journal of Speech-Language Pathology*, 25(4S), S743-S757.
- Dietz, A., Vannest, J., Maloney, T., Altaye, M., Holland, S., & Szaflarski, J. P. (2018). The feasibility of improving discourse in people with aphasia through AAC: clinical and functional MRI correlates. *Aphasiology*, 32(6), 693-719.
- Dignam, J., Copland, D., Rawlings, A., O'Brien, K., Burfein, P., & Rodriguez, A. D. (2016). The relationship between novel word learning and anomia treatment success in adults with chronic aphasia. *Neuropsychologia*, 81, 186-197.
- Duncan, E. S., Schmah, T., & Small, S. L. (2016). Performance Variability as a Predictor of Response to Aphasia Treatment. *Neurorehabilitation & Neural Repair*, 30(9), 876-82.
- Duncan, E. S., & Small, S. L. (2017). Imitation-based aphasia therapy increases narrative content: a case series. *Clinical Rehabilitation*, 31(11), 1500-1507.
- Durand, E., Berroir, P., & Ansaldo, A. I. (2018). The Neural and Behavioral Correlates of Anomia Recovery following Personalized Observation, Execution, and Mental Imagery Therapy: A Proof of Concept. *Neural Plasticity*, 2018, 5943759.
- Edmonds, L. A., & Babb, M. (2011). Effect of verb network strengthening treatment in moderate-to-severe aphasia. *American Journal of Speech-Language Pathology*, 20(2), 131-45.
- Edmonds, L. A., Mammino, K., & Ojeda, J. (2014). Effect of Verb Network Strengthening Treatment (VNeST) in persons with aphasia: extension and replication of previous findings. *American Journal of Speech-Language Pathology*, 23(2), S312-29.



- Edmonds, L. A., Nadeau, S. E., & Kiran, S. (2009). Effect of Verb Network Strengthening Treatment (VNeST) on Lexical Retrieval of Content Words in Sentences in Persons with Aphasia. *Aphasiology*, 23(3), 402-424.
- Efstratiadou, E. A., Papathanasiou, I., Holland, R., Varlokosta, S., & Hilari, K. (2019). Efficacy of elaborated semantic features analysis in Aphasia: a quasi-randomised controlled trial. *Aphasiology*, 33(12), 1482-1503.
- Eom, B., & Sung, J. E. (2016). The Effects of Sentence Repetition-Based Working Memory Treatment on Sentence Comprehension Abilities in Individuals With Aphasia. *American Journal of Speech-Language Pathology*, 25(4S), S823-S838.
- Falconer, C., & Antonucci, S. M. (2012). Use of semantic feature analysis in group discourse treatment for aphasia: Extension and expansion. *Aphasiology*, 26(1), 64-82.
- Faroqi-Shah, Y. (2013). Selective treatment of regular versus irregular verbs in agrammatic aphasia: Efficacy data. *Aphasiology*, 27(6), 678-705.
- Faroqi-Shah, Y., & Graham, L. E. (2011). Treatment of semantic verb classes in aphasia: acquisition and generalization effects. *Clinical Linguistics & Phonetics*, 25(5), 399-418.
- Faroqi-Shah, Y., & Virion, C. R. (2009). Constraint-induced language therapy for agrammatism: role of grammaticality constraints. *Aphasiology*, 23(7/8), 977-988.
- Ferguson, N. F., Evans, K., & Raymer, A. M. (2012). A comparison of intention and pantomime gesture treatment for noun retrieval in people with aphasia. *American Journal of Speech-Language Pathology*, 21(2), S126-39.
- Fisher, C. A., Wilshire, C. E., & Ponsford, J. P. (2009). Word discrimination therapy: A new technique for the treatment of a phonologically based word-finding impairment. *Aphasiology*, 23(6), 676-693.
- Fox, S., Armstrong, E., & Boles, L. (2009). Conversational treatment in mild aphasia: a case study. *Aphasiology*, 23(7/8), 951-964.
- Fridriksson, J. (2010). Preservation and modulation of specific left hemisphere regions is vital for treated recovery from anomia in stroke. *Journal of Neuroscience*, 30(35), 11558-64.
- Fridriksson, J., Baker, J. M., Whiteside, J., Eoute, D., Jr., Moser, D., Vesselinov, R., & Rorden, C. (2009). Treating visual speech perception to improve speech production in nonfluent aphasia. *Stroke*, 40(3), 853-8.
- Fridriksson, J., Hubbard, H. I., Hudspeth, S. G., Holland, A. L., Bonilha, L., Fromm, D., & Rorden, C. (2012). Speech entrainment enables patients with Broca's aphasia to produce fluent speech. *Brain*, 135(Pt 12), 3815-29.
- Friedman, R. B., Sullivan, K. L., Snider, S. F., Luta, G., & Jones, K. T. (2017). Leveraging the test effect to improve maintenance of the gains achieved through cognitive rehabilitation. *Neuropsychology*, 31(2), 220-228.
- Furnas, D. W., & Edmonds, L. A. (2014). The effect of computerised Verb Network Strengthening Treatment on lexical retrieval in aphasia. *Aphasiology*, 28(4), 401-420.
- Gabriela Sigurðardóttir, Z., & Blöndahl Sighvatsson, M. (2012). Treatment of Chronic Aphasia with Errorless Learning Procedures: A Direct Replication. *Journal of Speech-Language Pathology & Applied Behavior Analysis*, 5(3/4), 47-58.
- Getz, H., Snider, S., Brennan, D., & Friedman, R. (2016). Successful remote delivery of a treatment for phonological alexia via telerehab. *Neuropsychological Rehabilitation*, 26(4), 584-609.
- Gili, T., Fiori, V., De Pasquale, G., Sabatini, U., Caltagirone, C., & Marangolo, P. (2017). Right sensory-motor functional networks subserve action observation therapy in aphasia. *Brain Imaging & Behavior*, 11(5), 1397-1411.
- Gilmore, N., Meier, E. L., Johnson, J. P., & Kiran, S. (2018). Typicality-based semantic treatment for anomia results in multiple levels of generalization. *Neuropsychological Rehabilitation*. Advance online publication. <https://doi.org/10.1080/09602011.2018.1499533>
- Goldberg, S., Haley, K. L., & Jacks, A. (2012). Script training and generalization for people with aphasia. *American Journal of Speech-Language Pathology*, 21(3), 222-38.
- Goral, M., & Kempler, D. (2009). Training Verb Production in Communicative Context: Evidence from a Person with Chronic Non-Fluent Aphasia. *Aphasiology*, 23(12), 1383-1397.
- Goral, M., Levy, E. S., & Kastl, R. (2010). Cross-language treatment generalisation: A case of trilingual aphasia. *Aphasiology*, 24(2), 170-187.
- Goral, M., Rosas, J., Conner, P. S., Maul, K. K., & Obler, L. K. (2012). Effects of language proficiency and language of the environment on aphasia therapy in a multilingual. *Journal of Neurolinguistics*, 25(6), 538-551.

- Grasso, S. M., Cruz, D. F., Benavidez, R., Pena, E. D., & Henry, M. L. (2019). Video-Implemented Script Training in a Bilingual Spanish-English Speaker With Aphasia. *Journal of Speech, Language, & Hearing Research*, 62(7), 2295-2316.
- Gravier, M. L., Dickey, M. W., Hula, W. D., Evans, W. S., Owens, R. L., Winans-Mitrik, R. L., & Doyle, P. J. (2018). What Matters in Semantic Feature Analysis: Practice-Related Predictors of Treatment Response in Aphasia. *American Journal of Speech-Language Pathology*, 27(1S), 438-453.
- Grechuta, K., Bellaster, B. R., Munne, R. E., Bernal, T. U., Hervas, B. M., Segundo, R. S., & Verschure, P. (2017). The effects of silent visuomotor cueing on word retrieval in Broca's aphasias: A pilot study. *IEEE International Conference on Rehabilitation Robotics, 2017*, 193-199.
- Grechuta, K., Rubio Ballester, B., Espin Munne, R., Usabiaga Bernal, T., Molina Hervas, B., Mohr, B., Pulvermuller, F., San Segundo, R., & Verschure, P. (2019). Augmented Dyadic Therapy Boosts Recovery of Language Function in Patients With Nonfluent Aphasia. *Stroke*, 50(5), 1270-1274.
- Grechuta, K., Rubio, B., Duff, A., Oller, E. D., Pulvermüller, F., & Verschure, P. F. M. J. (2016). Intensive language-action therapy in virtual reality for a rehabilitation gaming system. *Journal of Pain Management*, 9(3), 243-254.
- Greenwood, A., Grassly, J., Hickin, J., & Best, W. (2010). Phonological and orthographic cueing therapy: A case of generalised improvement. *Aphasiology*, 24(9), 991-1016.
- Harnish, S. M., Morgan, J., Lundine, J. P., Bauer, A., Singletary, F., Benjamin, M. L., Gonzalez Rothi, L. J., & Crosson, B. (2014). Dosing of a cued picture-naming treatment for anomia. *American Journal of Speech-Language Pathology*, 23(2), S285-99.
- Harnish, S. M., Schwen Blackett, D., Zezinka, A., Lundine, J. P., & Pan, X. (2018). Influence of working memory on stimulus generalization in anomia treatment: A pilot study. *Journal of Neurolinguistics*, 48, 142-156.
- Haro-Martínez, A. M., García-Concejero, V. E., López-Ramos, A., Maté-Arribas, E., López-Tápper, J., Lubrini, G., Díez-Tejedor, E., & Fuentes, B. (2017). Adaptation of melodic intonation therapy to Spanish: a feasibility pilot study. *Aphasiology*, 31(11), 1333-1343.
- Haro-Martinez, A. M., Lubrini, G., Madero-Jarabo, R., Díez-Tejedor, E., & Fuentes, B. (2019). Melodic intonation therapy in post-stroke nonfluent aphasia: a randomized pilot trial. *Clinical Rehabilitation*, 33(1), 44-53.
- Harris, L., Olson, A., & Humphreys, G. (2012). Rehabilitation of past tense verb production and non-canonical sentence production in left inferior frontal non-fluent aphasia. *Aphasiology*, 26(2), 143-161.
- Harris, L., Olson, A., & Humphreys, G. (2013). Overcoming the effect of letter confusability in letter-by-letter reading: a rehabilitation study. *Neuropsychological Rehabilitation*, 23(3), 429-62.
- Hashimoto, N. (2012). The use of semantic- and phonological-based feature approaches to treat naming deficits in aphasia. *Clinical Linguistics & Phonetics*, 26(6), 518-53.
- Hashimoto, N., & Frome, A. (2011). The use of a modified semantic features analysis approach in aphasia. *Journal of Communication Disorders*, 44(4), 459-69.
- Hashimoto, N., Widman, B., Kiran, S., & Richards, M. A. (2013). A comparison of features and categorical cues to improve naming abilities in aphasia. *Aphasiology*, 27(10), 1252-1279.
- Hendricks, C. T., Nicholas, M. L., & Zipse, L. (2014). Effects of phonological neighbourhood on the treatment of naming in aphasia. *Aphasiology*, 28(3), 338-358.
- Herbert, R., Gregory, E., & Best, W. (2014). Syntactic versus lexical therapy for anomia in acquired aphasia: differential effects on narrative and conversation. *International Journal of Language & Communication Disorders*, 49(2), 162-73.
- Herbert, R., Webster, D., & Dyson, L. (2012). Effects of syntactic cueing therapy on picture naming and connected speech in acquired aphasia. *Neuropsychological Rehabilitation*, 22(4), 609-33.
- Hickin, Julie, Mehta, Beejal, & Dipper, Lucy (2015). To the sentence and beyond: a single case therapy report for mild aphasia. *Aphasiology*, 29(9), 1038-1061.
- Holland, R., Johns, S. L., & Woollams, A. M. (2018). The impact of phonological versus semantic repetition training on generalisation in chronic stroke aphasia reflects differences in dorsal pathway connectivity. *Neuropsychological Rehabilitation*, 28(4), 548-567.
- Hoover, E. L., Caplan, D., Waters, G., & Budson, A. (2015). Effects of impairment-based individual and socially oriented group therapies on verb production in aphasia. *Aphasiology*, 29(7), 781-798.

- Hough, M. S. (2010). Melodic intonation therapy and aphasia: Another variation on a theme. *Aphasiology*, *24*(6-8), 775-786.
- Hough, M., & Johnson, R. K. (2009). Use of AAC to enhance linguistic communication skills in an adult with chronic severe aphasia. *Aphasiology*, *23*(7/8), 965-976.
- Javadipour, S., Nejati, V., Yadegari, F., Javadipour, S., & Fazel, S. A. A. (2018). A visual attention training program for the improvement of auditory comprehension in aphasia. *NeuroQuantology*, *16*(1), 14-24.
- Johnson, J. P., Ross, K., & Kiran, S. (2019). Multi-step treatment for acquired alexia and agraphia (Part I): efficacy, generalisation, and identification of beneficial *treatment steps*. *Neuropsychological Rehabilitation*, *29*(4), 534-564.
- Johnson, M. L., Taub, E., Harper, L. H., Wade, J. T., Bowman, M. H., Bishop-McKay, S., Haddad, M. M., Mark, V. W., & Uswatte, G. (2014). An enhanced protocol for constraint-induced aphasia therapy II: a case series. *American Journal of Speech-Language Pathology*, *23*(1), 60-72.
- Jungblut, M., Huber, W., Mais, C., & Schnitker, R. (2014). Paving the way for speech: voice-training-induced plasticity in chronic aphasia and apraxia of speech--three single cases. *Neural Plasticity*, *2014*, 841982.
- Kalinyak-Fliszar, M., Kohen, F., & Martin, N. (2011). Remediation of language processing in aphasia: Improving activation and maintenance of linguistic representations in (verbal) short-term memory. *Aphasiology*, *25*(10), 1095-1131.
- Kavian, S., Khatoonabadi, A. R., Ansari, N. N., Saadati, M., & Shaygannejad, V. (2014). A Single-subject Study to Examine the Effects of Constrained-induced Aphasia Therapy on Naming Deficit. *International Journal of Preventive Medicine*, *5*(6), 782-6.
- Kempler, D., & Goral, M. (2011). A comparison of drill- and communication-based treatment for aphasia. *Aphasiology*, *25*(11), 1327-1346.
- Kendall, D. L., Oelke, M., Brookshire, C. E., & Nadeau, S. E. (2015). The Influence of Phonomotor Treatment on Word Retrieval Abilities in 26 Individuals With Chronic Aphasia: An Open Trial. *Journal of Speech, Language, & Hearing Research*, *58*(3), 798-812.
- Kendall, D., Raymer, A., Rose, M., Gilbert, J., & Gonzalez Rothi, L. J. (2014). Anomia treatment platform as behavioral engine for use in research on physiological adjuvants to neurorehabilitation. *Journal of Rehabilitation Research & Development*, *51*(3), 391-400.
- Kerry, S. J., Aguilar, O. M., Penny, W., Crinion, J. T., Leff, A. P., & Woodhead, Z. V. J. (2019). How Does iReadMore Therapy Change the Reading Network of Patients with Central Alexia? *Journal of Neuroscience*, *39*(29), 5719-5727.
- Kim, E. S., & Lemke, S. F. (2016). Behavioural and eye-movement outcomes in response to text-based reading treatment for acquired alexia. *Neuropsychological Rehabilitation*, *26*(1), 60-86.
- Kiran, S., Caplan, D., Sandberg, C., Levy, J., Berardino, A., Ascenso, E., Villard, S., & Tripodis, Y. (2012). Development of a theoretically based treatment for sentence comprehension deficits in individuals with aphasia. *American Journal of Speech-Language Pathology*, *21*(2), S88-S102.
- Kiran, S., Meier, E. L., Kapse, K. J., & Glynn, P. A. (2015). Changes in task-based effective connectivity in language networks following rehabilitation in post-stroke patients with aphasia. *Frontiers in Human Neuroscience*, *9*, 316.
- Kiran, S., & Roberts, P. M. (2010). Semantic feature analysis treatment in Spanish-English and French-English bilingual aphasia. *Aphasiology*, *24*(2), 231-261.
- Kiran, S., Sandberg, C., & Abbott, K. (2009). Treatment for lexical retrieval using abstract and concrete words in persons with aphasia: Effect of complexity. *Aphasiology*, *23*(7), 835-853.
- Kiran, S., Sandberg, C., Gray, T., Ascenso, E., & Kester, E. (2013). Rehabilitation in bilingual aphasia: evidence for within- and between-language generalization. *American Journal of Speech-Language Pathology*, *22*(2), S298-309.
- Kiran, S., Sandberg, C., & Sebastian, R. (2011). Treatment of category generation and retrieval in aphasia: effect of typicality of category items. *Journal of Speech, Language, & Hearing Research*, *54*(4), 1101-17.
- Knollman-Porter, K., Dietz, A., & Dahlem, K. (2018). Intensive Auditory Comprehension Treatment for Severe Aphasia: A Feasibility Study. *American Journal of Speech-Language Pathology*, *27*(3), 936-949.

- Knoph, M. I. N., Lind, M., & Simonsen, H. G. (2015). Semantic feature analysis targeting verbs in a quadrilingual speaker with aphasia. *Aphasiology*, *29*(12), 1473-1496.
- Knoph, M. I. N., Simonsen, H. G., & Lind, M. (2017). Cross-linguistic transfer effects of verb-production therapy in two cases of multilingual aphasia. *Aphasiology*, *31*(12), 1482-1509.
- Kristensson, J., Behrns, I., & Saldert, C. (2015). Effects on communication from intensive treatment with semantic feature analysis in aphasia. *Aphasiology*, *29*(4), 466-487.
- Kurland, J., & Falcon, M. (2011). Effects of cognate status and language of therapy during intensive semantic naming treatment in a case of severe nonfluent bilingual aphasia. *Clinical Linguistics & Phonetics*, *25*(6-7), 584-600.
- Kurland, J., Liu, A., & Stokes, P. (2018). Effects of a Tablet-Based Home Practice Program With Telepractice on Treatment Outcomes in Chronic Aphasia. *Journal of Speech, Language, & Hearing Research*, *61*(5), 1140-1156.
- Kurland, J., Pulvermuller, F., Silva, N., Burke, K., & Andrianopoulos, M. (2012). Constrained versus unconstrained intensive language therapy in two individuals with chronic, moderate-to-severe aphasia and apraxia of speech: behavioral and fMRI outcomes. *American Journal of Speech-Language Pathology*, *21*(2), S65-87.
- Kurland, J., Stanek, E. J., 3rd, Stokes, P., Li, M., & Andrianopoulos, M. (2016). Intensive Language Action Therapy in Chronic Aphasia: A Randomized Clinical Trial Examining Guidance by Constraint. *American Journal of Speech-Language Pathology*, *25*(4S), S798-S812.
- Kurland, J., Wilkins, A. R., & Stokes, P. (2014). iPractice: piloting the effectiveness of a tablet-based home practice program in aphasia treatment. *Seminars in Speech & Language*, *35*(1), 51-63.
- Lacey, E. H., Lott, S. N., Snider, S. F., Sperling, A., & Friedman, R. B. (2010). Multiple Oral Re-reading treatment for alexia: The parts may be greater than the whole. *Neuropsychological Rehabilitation*, *20*(4), 601-623.
- Lavoie, M., Bier, N., & Macoir, J. (2019). Efficacy of a self-administered treatment using a smart tablet to improve functional vocabulary in post-stroke aphasia: a case-series study. *International Journal of Language & Communication Disorders*, *54*(2), 249-264.
- Lavoie, M., Routhier, S., Legare, A., & Macoir, J. (2016). Treatment of verb anomia in aphasia: efficacy of self-administered therapy using a smart tablet. *Neurocase*, *22*(1), 109-18.
- Lee, J. B., Kaye, R. C., & Cherney, L. R. (2009). Conversational script performance in adults with non-fluent aphasia: treatment intensity and aphasia severity. *Aphasiology*, *23*(7/8), 885-897.
- Lee, J. B., & Moore Sohlberg, M. (2013). Evaluation of attention training and metacognitive facilitation to improve reading comprehension in aphasia. *American Journal of Speech-Language Pathology*, *22*(2), S318-33.
- Lee, J. B., Sohlberg, M. M., Harn, B., Horner, R., & Cherney, L. R. (2018). Attention Process Training-3 to improve reading comprehension in mild aphasia: A single-case experimental design study. *Neuropsychological Rehabilitation*. Advance online publication. <https://doi.org/10.1080/09602011.2018.1477683>
- Leonard, C., Laird, L., Burianová, H., Graham, S., Grady, C., Simic, T., & Rochon, E. (2015). Behavioural and neural changes after a "choice" therapy for naming deficits in aphasia: preliminary findings. *Aphasiology*, *29*(4), 506-525.
- Lerman, A., Edmonds, L. A., & Goral, M. (2019). Cross-language generalisation in bilingual aphasia: what are we missing when we do not analyse discourse? *Aphasiology*, *33*(9), 1154-1162.
- Links, P., Hurkmans, J., & Bastiaanse, R. (2010). Training verb and sentence production in agrammatic Broca's aphasia. *Aphasiology*, *24*(11), 1303-1325.
- Lorenz, A., & Ziegler, W. (2009). Semantic vs. word-form specific techniques in anomia treatment: A multiple single-case study. *Journal of Neurolinguistics*, *22*(6), 515-537.
- Lucchese, G., Pulvermuller, F., Stahl, B., Dreyer, F. R., & Mohr, B. (2016). Therapy-Induced Neuroplasticity of Language in Chronic Post Stroke Aphasia: A Mismatch Negativity Study of (A)Grammatical and Meaningful/less Mini-Constructions. *Frontiers in Human Neuroscience*, *10*, 669.
- MacGregor, L. J., Difrancesco, S., Pulvermuller, F., Shtyrov, Y., & Mohr, B. (2015). Ultra-rapid access to words in chronic aphasia: the effects of intensive language action therapy (ILAT). *Brain Topography*, *28*(2), 279-91.
- Mack, J. E., Nerantzini, M., & Thompson, C. K. (2017). Recovery of Sentence Production Processes Following Language Treatment in Aphasia: Evidence from Eyetracking. *Frontiers in Human Neuroscience*, *11*, 101.



- Mack, J. E., & Thompson, C. K. (2017). Recovery of Online Sentence Processing in Aphasia: Eye Movement Changes Resulting From Treatment of Underlying Forms. *Journal of Speech, Language, & Hearing Research*, 60(5), 1299-1315.
- Macoir, J., Sauvageau, V. M., Boissy, P., Tousignant, M., & Tousignant, M. (2017). In-Home Synchronous Telespeech Therapy to Improve Functional Communication in Chronic Poststroke Aphasia: Results from a Quasi-Experimental Study. *Telemedicine Journal & E-Health*, 23(8), 630-639.
- Manheim, L. M., Halper, A. S., & Cherney, L. (2009). Patient-reported changes in communication after computer-based script training for aphasia. *Archives of Physical Medicine & Rehabilitation*, 90(4), 623-7.
- Marangolo, P., Bonifazi, S., Tomaiuolo, F., Craighero, L., Coccia, M., Altoe, G., Provinciali, L., & Cantagallo, A. (2010). Improving language without words: first evidence from aphasia. *Neuropsychologia*, 48(13), 3824-33.
- Marangolo, P., Fiori, V., Caltagirone, C., & Marini, A. (2013). How Conversational Therapy influences language recovery in chronic non-fluent aphasia. *Neuropsychological Rehabilitation*, 23(5), 715-31.
- Marcotte, K., Adrover-Roig, D., Damien, B., de Preaumont, M., Genereux, S., Hubert, M., & Ansaldo, A. I. (2012). Therapy-induced neuroplasticity in chronic aphasia. *Neuropsychologia*, 50(8), 1776-86.
- Marcotte, K., Laird, L., Bitan, T., Meltzer, J. A., Graham, S. J., Leonard, C., Rochon, E. (2018). Therapy-Induced Neuroplasticity in Chronic Aphasia After Phonological Component Analysis: A Matter of Intensity. *Frontiers in neurology*, 9, 225.
- Marshall, J., Best, W., Cocks, N., Cruice, M., Pring, T., Bulcock, G., Creek, G., Eales, N., Mummery, A. L., Matthews, N., & Cauter, A. (2012). Gesture and naming therapy for people with severe aphasia: a group study. *Journal of Speech, Language, & Hearing Research*, 55(3), 726-38.
- Marshall, J., Booth, T., Devane, N., Galliers, J., Greenwood, H., Hilari, K., Talbot, R., Wilson, S., & Woolf, C. (2016). Evaluating the Benefits of Aphasia Intervention Delivered in Virtual Reality: Results of a Quasi-Randomised Study. *PLoS ONE*, 11(8), e0160381.
- Marshall, J., Cauter, A., Chadd, K., Cruice, M., Monnelly, K., Wilson, S., & Woolf, C. (2019). Technology-enhanced writing therapy for people with aphasia: results of a quasi-randomized waitlist controlled study. *International Journal of Language & Communication Disorders*, 54(2), 203-220.
- Marshall, J., Devane, N., Edmonds, L., Talbot, R., Wilson, S., Woolf, C., & Zwart, N. (2018). Delivering word retrieval therapies for people with aphasia in a virtual communication environment. *Aphasiology*, 32(9), 1054-1074.
- Marshall, J., Roper, A., Galliers, J., Wilson, S., Cocks, N., Muscroft, S., & Pring, T. (2013). Computer delivery of gesture therapy for people with severe aphasia. *Aphasiology*, 27(9), 1128-1146.
- Mason, C., Nickels, L., McDonald, B., Moses, M., Makin, K., & Taylor, C. (2011). Treatment of word retrieval impairments in aphasia: Evaluation of a self-administered home programme using personally chosen words. *Aphasiology*, 25(2), 245-268.
- Maul, K. K., Conner, P. S., Kempler, D., Radvanski, C., & Goral, M. (2014). Using informative verbal exchanges to promote verb retrieval in nonfluent aphasia. *American Journal of Speech-Language Pathology*, 23(3), 407-20.
- Mauszycki, S. C., Nessler, C., & Wambaugh, J. L. (2016). Melodic intonation therapy applied to the production of questions in aphasia. *Aphasiology*, 30(10), 1094-1116.
- McCall, D., Virata, T., Linebarger, M. C., & Berndt, R. S. (2009). Integrating technology and targeted treatment to improve narrative production in aphasia: A case study. *Aphasiology*, 23(4), 438-461.
- McCann, C., & Doleman, J. (2011). Verb retrieval in nonfluent aphasia: A replication of Edwards & Tucker, 2006. *Journal of Neurolinguistics*, 24(2), 237-248.
- McCarthy, L. M., Kalinyak-Fliszar, M., Kohen, F., & Martin, N. (2017). Effects of semantic context on access to words of low imageability in deep-phonological dysphasia: a treatment case study. *Aphasiology*, 31(5), 542-562.
- McKinnon, E. T., Fridriksson, J., Glenn, G. R., Jensen, J. H., Helpert, J. A., Basilakos, A., Rorden, C., Shih, A. Y., Spampinato, M. V., & Bonilha, L. (2017). Structural plasticity of the ventral stream and aphasia recovery. *Annals of Neurology*, 82(1), 147-151.
- Mehta, Sonia V., & Isaki, Emi (2016). A Modified Semantic Feature Analysis Approach With Two Individuals With Chronic Aphasia. *Contemporary Issues in Communication Science & Disorders*, 43, 129-138.

- Meinzer, M., Mohammadi, S., Kugel, H., Schiffbauer, H., Floel, A., Albers, J., Kramer, K., Menke, R., Baumgartner, A., Knecht, S., Breitenstein, C., & Deppe, M. (2010). Integrity of the hippocampus and surrounding white matter is correlated with language training success in aphasia. *Neuroimage*, *53*(1), 283-90.
- Menke, R., Meinzer, M., Kugel, H., Deppe, M., Baumgartner, A., Schiffbauer, H., Thomas, M., Kramer, K., Lohmann, H., Floel, A., Knecht, S., & Breitenstein, C. (2009). Imaging short- and long-term training success in chronic aphasia. *BMC Neuroscience*, *10*, 118.
- Middleton, E. L., Rawson, K. A., & Verkuilen, J. (2019). Retrieval practice and spacing effects in multi-session treatment of naming impairment in aphasia. *Cortex*, *119*, 386-400.
- Middleton, E. L., Schwartz, M. F., Rawson, K. A., & Garvey, K. (2015). Test-enhanced learning versus errorless learning in aphasia rehabilitation: testing competing psychological principles. *Journal of Experimental Psychology: Learning, Memory, & Cognition*, *41*(4), 1253-61.
- Middleton, E. L., Schwartz, M. F., Rawson, K. A., Traut, H., & Verkuilen, J. (2016). Towards a Theory of Learning for Naming Rehabilitation: Retrieval Practice and Spacing Effects. *Journal of Speech, Language, & Hearing Research*, *59*(5), 1111-1122.
- Miertsch, B., Meisel, J. M., & Isel, F. (2009). Non-treated languages in aphasia therapy of polyglots benefit from improvement in the treated language. *Journal of Neurolinguistics*, *22*(2), 135-150.
- Milman, L., Clendenen, D., & Vega-Mendoza, M. (2014). Production and integrated training of adjectives in three individuals with nonfluent aphasia. *Aphasiology*, *28*(10), 1198-1222.
- Milman, L., Vega-Mendoza, M., & Clendenen, D. (2014). Integrated training for aphasia: an application of part-whole learning to treat lexical retrieval, sentence production, and discourse-level communications in three cases of nonfluent aphasia. *American Journal of Speech-Language Pathology*, *23*(2), 105-19.
- Mohr, B., Difrancesco, S., Harrington, K., Evans, S., & Pulvermuller, F. (2014). Changes of right-hemispheric activation after constraint-induced, intensive language action therapy in chronic aphasia: fMRI evidence from auditory semantic processing. *Frontiers in Human Neuroscience*, *8*, 919.
- Morris, J., & Franklin, S. (2012). Investigating the effect of a semantic therapy on comprehension in aphasia. *Aphasiology*, *26*(12), 1461-1480.
- Morrow-Odom, K. L., & Swann, A. B. (2013). Effectiveness of melodic intonation therapy in a case of aphasia following right hemisphere stroke. *Aphasiology*, *27*(11), 1322-1338.
- Mozeiko, J., Coelho, C. A., & Myers, E. B. (2016). The role of intensity in constraint-induced language therapy for people with chronic aphasia. *Aphasiology*, *30*(4), 339-363.
- Mozeiko, J., Myers, E. B., & Coelho, C. A. (2018). Treatment Response to a Double Administration of Constraint-Induced Language Therapy in Chronic Aphasia. *Journal of Speech, Language, & Hearing Research*, *61*(7), 1664-1690.
- Muñoz, Maria L. (2011). Reducing Aphasic Perseverations: A Case Study. *Perspectives on Neurophysiology & Neurogenic Speech & Language Disorders*, *21*(4), 176-183.
- Munro, P., & Siyambalapitiya, S. (2017). Improved word comprehension in Global aphasia using a modified semantic feature analysis treatment. *Clinical Linguistics & Phonetics*, *31*(2), 119-136.
- Naomi, Hashimoto (2016). The Use of One or Three Semantic Associative Primes in Treating Anomia in Aphasia. *American Journal of Speech-Language Pathology*, *25*, S665-S686.
- Nardo, D., Holland, R., Leff, A. P., Price, C. J., & Crinion, J. T. (2017). Less is more: Neural mechanisms underlying anomia treatment in chronic aphasic patients. *Brain*, *140*(11), 3039-3054.
- Nenert, R., Allendorfer, J. B., Martin, A. M., Banks, C., Ball, A., Vannest, J., Dietz, A. R., & Szaflarski, J. P. (2017). Neuroimaging Correlates of Post-Stroke Aphasia Rehabilitation in a Pilot Randomized Trial of Constraint-Induced Aphasia Therapy. *Medical Science Monitor*, *23*, 3489-3507.
- Neumann, Y. (2018). A case series comparison of semantically focused vs. phonologically focused cued naming treatment in aphasia. *Clinical Linguistics & Phonetics*, *32*(1), 1-27.
- Newton, C., Kirby, P., & Bruce, C. (2017). Getting into shape: the effect of Shape Coding on the spoken language production of two men with chronic aphasia. *Aphasiology*, *31*(12), 1459-1481.
- Nicholas, M., Sinotte, M. P., & Helm-Estabrooks, N. (2011). C-Speak Aphasia alternative communication program for people with severe aphasia: importance of executive functioning and semantic knowledge. *Neuropsychological Rehabilitation*, *21*(3), 322-66.

- Nickels, L., McDonald, B., & Mason, C. (2016). The impact of group therapy on word retrieval in people with chronic aphasia. *Neurorehabilitation*, 39(1), 81-95.
- Nickels, L., & Osborne, A. (2016). Constraint Induced Aphasia Therapy: Volunteer-led, unconstrained and less intense delivery can be effective. *Neurorehabilitation*, 39(1), 97-109.
- Nobis-Bosch, R., Springer, L., Radermacher, I., & Huber, W. (2011). Supervised home training of dialogue skills in chronic aphasia: a randomized parallel group study. *Journal of Speech, Language, & Hearing Research*, 54(4), 1118-36.
- Nouwens, F., de Lau, L. M., Visch-Brink, E. G., van de Sandt-Koenderman, W. M., Lingsma, H. F., Goosen, S., Blom, D. M., Koudstaal, P. J., & Dippel, D. W. (2017). Efficacy of early cognitive-linguistic treatment for aphasia due to stroke: A randomised controlled trial (Rotterdam Aphasia Therapy Study-3). *European Stroke Journal*, 2(2), 126-136.
- Nykänen, A., Nyrkö, H., Nykänen, M., Brunou, R., & Rautakoski, P. (2013). Communication therapy for people with aphasia and their partners (APPUTE). *Aphasiology*, 27(10), 1159-1179.
- Obermeyer, J. A., Rogalski, Y., & Edmonds, L. A. (2019). Attentive Reading with Constrained Summarization-Written, a multi-modality discourse-level treatment for mild aphasia. *Aphasiology*. Advance online publication. <https://doi.org/10.1080/02687038.2019.1686743>
- Off, C. A., Griffin, J. R., Spencer, K. A., & Rogers, M. (2016). The impact of dose on naming accuracy with persons with aphasia. *Aphasiology*, 30(9), 983-1011.
- Olsen, E., Freed, D. B., & Marshall, R. C. (2012). Generalisation of personalised cueing to enhance word finding in natural settings. *Aphasiology*, 26(5), 618-631.
- Orlowska, E., Rasmus, A., Góral-Pórola, J., & Morga, R., P (2018). The long-time effects of group therapy intervention on marriage communication between fluent and non-fluent aphasic patients and their spouses: Who benefits the most? *Acta Neuropsychologica*, 16(3), 229-241.
- Park, Youngmi, Goral, Mira, Verkuilen, Jay, & Kempler, Daniel (2013). Effects of noun–verb conceptual/phonological relatedness on verb production changes in Broca's aphasia. *Aphasiology*, 27(7), 811-827.
- Peach, R. K., Beck, K. M., Gorman, M., & Fisher, C. (2019). Clinical Outcomes Following Language-Specific Attention Treatment Versus Direct Attention Training for Aphasia: A Comparative Effectiveness Study. *Journal of Speech, Language, & Hearing Research*, 62(8), 2785-2811.
- Peach, R. K., Nathan, M. R., & Beck, K. M. (2017). Language-Specific Attention Treatment for Aphasia: Description and Preliminary Findings. *Seminars in Speech & Language*, 38(1), 5-16.
- Peach, R. K., & Reuter, K. A. (2010). A discourse-based approach to semantic feature analysis for the treatment of aphasic word retrieval failures. *Aphasiology*, 24(9), 971-990.
- Penn, C., & Archer, B. (2011). The treatment of anomia in Sesotho: a case for parametric aphasiology. *Clinical Linguistics & Phonetics*, 25(11-12), 1059-65.
- Pitt, R., Theodoros, D., Hill, A. J., Rodriguez, A. D., & Russell, T. (2017). The feasibility of delivering constraint-induced language therapy via the Internet. *Digital Health*, 3, 2055207617718767.
- Pitt, R., Theodoros, D., Hill, A. J., & Russell, T. (2019). The development and feasibility of an online aphasia group intervention and networking program – TeleGAIN. *International Journal of Speech-language Pathology*, 21(1), 23-36.
- Pitt, R., Theodoros, D., Hill, A. J., & Russell, T. (2019). The impact of the telerehabilitation group aphasia intervention and networking programme on communication, participation, and quality of life in people with aphasia. *International Journal of Speech-language Pathology*, 21(5), 513-523.
- Purdy, M., & Van Dyke, J. A. (2011). Multimodal Communication Training in Aphasia: A Pilot Study. *Journal of Medical Speech-Language Pathology*, 19(3), 45-53.
- Purdy, M., & Wallace, S. E. (2016). Intensive multimodal communication treatment for people with chronic aphasia. *Aphasiology*, 30(10), 1071-1093.
- Raymer, A. M., McHose, B., Smith, K. G., Iman, L., Ambrose, A., & Casselton, C. (2012). Contrasting effects of errorless naming treatment and gestural facilitation for word retrieval in aphasia. *Neuropsychological Rehabilitation*, 22(2), 235-66.

- Raymer, A., Strobel, J., Prokup, T., Thomason, B., & Reff, K. L. (2010). Errorless versus errorful training of spelling in individuals with acquired dysgraphia. *Neuropsychological Rehabilitation*, *20*(1), 1-15.
- Renvall, K., & Nickels, L. (2019). Using treatment to improve the production of emotive adjectives in aphasia: a single-case study. *Aphasiology*, *33*(11), 1348-1371.
- Rhodes, N. C., & Isaki, E. (2018). Script Training Using Telepractice with Two Adults with Chronic Non-Fluent Aphasia. *International Journal of Telerehabilitation*, *10*(2), 89-104.
- Rochon, E., Leonard, C., Burianova, H., Laird, L., Soros, P., Graham, S., & Grady, C. (2010). Neural changes after phonological treatment for anomia: An fMRI study. *Brain & Language*, *114*(3), 164-79.
- Rogalski, Y., Edmonds, L. A., Daly, V. R., & Gardner, M. J. (2013). Attentive Reading and Constrained Summarisation (ARCS) discourse treatment for chronic Wernicke's aphasia. *Aphasiology*, *27*(10), 1232-1251.
- Romani, C., Thomas, L., Olson, A., & Lander, L. (2019). Playing a team game improves word production in poststroke aphasia. *Aphasiology*, *33*(3), 253-288.
- Roper, A., Marshall, J., & Wilson, S. (2016). Benefits and Limitations of Computer Gesture Therapy for the Rehabilitation of Severe Aphasia. *Frontiers in Human Neuroscience*, *10*, 595.
- Rose, M. L., Attard, M. C., Mok, Z., Lanyon, L. E., & Foster, A. M. (2013). Multi-modality aphasia therapy is as efficacious as a constraint-induced aphasia therapy for chronic aphasia: A phase 1 study. *Aphasiology*, *27*(8), 938-971.
- Routhier, S., Bier, N., & Macoir, J. (2015). The contrast between cueing and/or observation in therapy for verb retrieval in post-stroke aphasia. *Journal of Communication Disorders*, *54*, 43-55.
- Routhier, S., Bier, N., & Macoir, J. (2016). Smart tablet for smart self-administered treatment of verb anomia: two single-case studies in aphasia. *Aphasiology*, *30*(2-3), 269-289.
- Ruiter, M. B., Kolk, H. H., & Rietveld, T. C. (2010). Speaking in ellipses: the effect of a compensatory style of speech on functional communication in chronic agrammatism. *Neuropsychological Rehabilitation*, *20*(3), 423-58.
- Ruiter, M. B., Rietveld, T. C., Hoskam, V., V. A. N. & Beers MM (2016). An Exploratory Investigation of E-Rest: Teletherapy for Chronically Aphasic Speakers. *International Journal of Telerehabilitation*, *8*(1), 21-8.
- Ryan, B., Hudson, K., Worrall, L., Simmons-Mackie, N., Thomas, E., Finch, E., Clark, K., & Lethlean, J. (2017). The Aphasia Action, Success, and Knowledge Programme: Results from an Australian Phase i Trial of a Speech-Pathology-Led Intervention for People with Aphasia Early Post Stroke. *Brain Impairment*, *18*(3), 284-298.
- Sage, K., Snell, C., & Lambon Ralph, M. A. (2011). How intensive does anomia therapy for people with aphasia need to be? *Neuropsychological Rehabilitation*, *21*(1), 26-41.
- Saldert, C., Backman, E., & Hartelius, L. (2013). Conversation partner training with spouses of persons with aphasia: A pilot study using a protocol to trace relevant characteristics. *Aphasiology*, *27*(3), 271-292.
- Salis, C. (2012). Short-term memory treatment: patterns of learning and generalisation to sentence comprehension in a person with aphasia. *Neuropsychological Rehabilitation*, *22*(3), 428-48.
- Salis, C., & Edwards, S. (2010). Treatment of written verb and written sentence production in an individual with aphasia: a clinical study. *Aphasiology*, *24*(9), 1051-1063.
- Salis, C., Hwang, F., Howard, D., & Lallini, N. (2017). Short-Term and Working Memory Treatments for Improving Sentence Comprehension in Aphasia: A Review and a Replication Study. *Seminars in Speech & Language*, *38*(1), 29-39.
- Sandberg, C., & Kiran, S. (2014). How justice can affect jury: training abstract words promotes generalisation to concrete words in patients with aphasia. *Neuropsychological Rehabilitation*, *24*(5), 738-69.
- Sarasso, S., Santhanam, P., Maatta, S., Poryazova, R., Ferrarelli, F., Tononi, G., & Small, S. L. (2010). Non-fluent aphasia and neural reorganization after speech therapy: insights from human sleep electrophysiology and functional magnetic resonance imaging. *Archives Italiennes de Biologie*, *148*(3), 271-8.
- Savage, M. C., Donovan, N. J., & Hoffman, P. R. (2014). Preliminary results from conversation therapy in two cases of Aphasia. *Aphasiology*, *28*(5), 616-636.
- Sazegar Nejad, S., Yadegari, F., & Teymouri, R. (2019). Persian Verb and Sentence Production Protocol (PVSP) and its efficacy on Persian-speaking agrammatic non-fluent persons with aphasia. *Aphasiology*. Advance online publication. <https://doi.org/10.1080/02687038.2019.1673305>



- Schuchard, J., & Middleton, E. L. (2018). The Roles of Retrieval Practice Versus Errorless Learning in Strengthening Lexical Access in Aphasia. *Journal of Speech, Language, & Hearing Research, 61*(7), 1700-1717.
- Sickert, A., Anders, L. C., Munte, T. F., & Sailer, M. (2014). Constraint-induced aphasia therapy following sub-acute stroke: a single-blind, randomised clinical trial of a modified therapy schedule. *Journal of Neurology, Neurosurgery & Psychiatry, 85*(1), 51-5.
- Silkes, J. A. P., Dierkes, K. E., & Kendall, D. L. (2013). Masked repetition priming effects on naming in aphasia: A Phase I treatment study. *Aphasiology, 27*(4), 381-397.
- Silkes, J. P. (2015). Masked Repetition Priming in Treatment of Anomia: A Phase 2 Study. *American Journal of Speech-Language Pathology, 24*(4), S895-912.
- Silkes, J. P. (2018). Masked Repetition Priming Treatment for Anomia. *Journal of Speech, Language, & Hearing Research, 61*(3), 690-712.
- Simic, T., Bitan, T., Turner, G., Chambers, C., Goldberg, D., Leonard, C., & Rochon, E. (2019). The role of executive control in post-stroke aphasia treatment. *Neuropsychological Rehabilitation*. Advance online publication. <https://doi.org/10.1080/09602011.2019.1611607>
- Snell, C., Sage, K., & Lambon Ralph, M. A. (2010). How many words should we provide in anomia therapy? A meta-analysis and a case series study. *Aphasiology, 24*(9), 1064-1094.
- Stahl, B., Henseler, I., Turner, R., Geyer, S., & Kotz, S. A. (2013). How to engage the right brain hemisphere in aphasics without even singing: evidence for two paths of speech recovery. *Frontiers in Human Neuroscience, 7*, 35.
- Stahl, B., Mohr, B., Dreyer, F. R., Lucchese, G., & Pulvermuller, F. (2016). Using language for social interaction: Communication mechanisms promote recovery from chronic non-fluent aphasia. *Cortex, 85*, 90-99.
- Stark, B. C., & Warburton, E. A. (2018). Improved language in chronic aphasia after self-delivered iPad speech therapy. *Neuropsychological Rehabilitation, 28*(5), 818-831.
- Szaflarski, J. P., Ball, A. L., Vannest, J., Dietz, A. R., Allendorfer, J. B., Martin, A. N., Hart, K., & Lindsell, C. J. (2015). Constraint-Induced Aphasia Therapy for Treatment of Chronic Post-Stroke Aphasia: A Randomized, Blinded, Controlled Pilot Trial. *Medical Science Monitor, 21*, 2861-9.
- Szelag, E., Lewandowska, M., Wolak, T., Seniow, J., Poniatowska, R., Pöppel, E., Szymaszek, A. (2014). Training in rapid auditory processing ameliorates auditory comprehension in aphasic patients: A randomized controlled pilot study. *Journal of the Neurological Sciences, 338*(1-2), 77-86.
- Takizawa, T., Nishida, N., Ikemoto, A., & Kurauchi, N. (2015). Comparison of single-word therapy versus sentence therapy for verb retrieval and sentence production in Broca's aphasia. *Aphasiology, 29*(2), 169-194.
- Tam, M. H., & Lau, D. K. (2019). Modified semantic feature analysis for anomia: a single case study. *Clinical Linguistics & Phonetics, 33*(10-11), 949-964.
- Thiel, L., Sage, K., & Conroy, P. (2016). Comparing uni-modal and multi-modal therapies for improving writing in acquired dysgraphia after stroke. *Neuropsychological Rehabilitation, 26*(3), 345-73.
- Thiel, L., Sage, K., & Conroy, P. (2017). Promoting linguistic complexity, greater message length and ease of engagement in email writing in people with aphasia: initial evidence from a study utilizing assistive writing software. *International Journal of Language & Communication Disorders, 52*(1), 106-124.
- Thiel, Lindsey, Sage, Karen, & Conroy, Paul (2016). The role of learning in improving functional writing in stroke aphasia. *Disability & Rehabilitation, 38*(21), 2122-2134.
- Thompson, C. K., Choy, J. W. J., Holland, A., & Cole, R. (2010). Sentactics®: Computer-automated treatment of underlying forms. *Aphasiology, 24*(10), 1242-1266.
- Thompson, C. K., den Ouden, D. B., Bonakdarpour, B., Garibaldi, K., & Parrish, T. B. (2010). Neural plasticity and treatment-induced recovery of sentence processing in agrammatism. *Neuropsychologia, 48*(11), 3211-27.
- Thompson, C. K., Riley, E. A., den Ouden, D. B., Meltzer-Asscher, A., & Lukic, S. (2013). Training verb argument structure production in agrammatic aphasia: behavioral and neural recovery patterns. *Cortex, 49*(9), 2358-76.
- Tuomiranta, Leena, Gronholm-Nyman, Petra, Kohen, Francine, Rautakoski, Pirkko, Laine, Matti, & Martin, Nadine (2011). Learning and maintaining new vocabulary in persons with aphasia: Two controlled case studies. *Aphasiology, 25*(9), 1030-1052.

- van de Sandt-Koenderman, M. W. M. E., Mendez Orellana, C. P., van der Meulen, I., Smits, M., & Ribbers, G. M. (2018). Language lateralisation after Melodic Intonation Therapy: an fMRI study in subacute and chronic aphasia. *Aphasiology*, *32*(7), 765-783.
- Van Der Meulen, I., Van De Sandt-Koenderman, M. W., Heijenbrok, M. H., Visch-Brink, E., & Ribbers, G. M. (2016). Melodic Intonation Therapy in Chronic Aphasia: Evidence from a Pilot Randomized Controlled Trial. *Frontiers in Human Neuroscience*, *10*, 533.
- van der Meulen, I., van de Sandt-Koenderman, W. M., Heijenbrok-Kal, M. H., Visch-Brink, E. G., & Ribbers, G. M. (2014). The Efficacy and Timing of Melodic Intonation Therapy in Subacute Aphasia. *Neurorehabilitation & Neural Repair*, *28*(6), 536-44.
- van Hees, S., McMahon, K., Angwin, A., de Zubicaray, G., & Copland, D. A. (2014). Neural activity associated with semantic versus phonological anomia treatments in aphasia. *Brain & Language*, *129*, 47-57.
- van Hees, S., McMahon, K., Angwin, A., de Zubicaray, G., Read, S., & Copland, D. A. (2014). A functional MRI study of the relationship between naming treatment outcomes and resting state functional connectivity in post-stroke aphasia. *Human Brain Mapping*, *35*(8), 3919-31.
- Vitali, P., Tettamanti, M., Abutalebi, J., Ansaldo, A. I., Perani, D., Cappa, S. F., & Joanette, Y. (2010). Generalization of the effects of phonological training for anomia using structural equation modelling: a multiple single-case study. *Neurocase*, *16*(2), 93-105.
- Vuksanovic, J., Milovanovic, T., Konstantinovic, L., & Filipovic, S. R. (2018). Effect of type of language therapy on expressive language skills in patients with post-stroke aphasia. *International Journal of Language & Communication Disorders*, *53*(4), 825-835.
- Waldron, H., Whitworth, A., & Howard, D. (2011). Comparing monitoring and production based approaches to the treatment of phonological assembly difficulties in aphasia. *Aphasiology*, *25*(10), 1153-1173.
- Waldron, H., Whitworth, A., & Howard, D. (2011). Therapy for phonological assembly difficulties: A case series. *Aphasiology*, *25*(4), 434-455.
- Wallace, S. E., & Kayode, S. (2017). Effects of a semantic plus multimodal communication treatment for modality switching in severe aphasia. *Aphasiology*, *31*(10), 1127-1142.
- Wallace, S. E., & Kimelman, M. D. (2013). Generalization of word retrieval following semantic feature treatment. *Neurorehabilitation*, *32*(4), 899-913.
- Wambaugh, J. L., Mauszycki, S., Cameron, R., Wright, S., & Nessler, C. (2013). Semantic feature analysis: incorporating typicality treatment and mediating strategy training to promote generalization. *American Journal of Speech-Language Pathology*, *22*(2), S334-69.
- Wambaugh, J. L., Mauszycki, S., & Wright, S. (2014). Semantic feature analysis: Application to confrontation naming of actions in aphasia. *Aphasiology*, *28*(1), 1-24.
- Wambaugh, J. L., Nessler, C., & Wright, S. (2013). Modified response elaboration training: application to procedural discourse and personal recounts. *American Journal of Speech-Language Pathology*, *22*(2), S409-25.
- Wambaugh, J. L., Wright, S., Mauszycki, S. C., Nessler, C., & Bailey, D. (2018). Combined aphasia and apraxia of speech treatment (CAAST): Systematic replications in the development of a novel treatment. *International Journal of Speech-language Pathology*, *20*(2), 247-261.
- Wambaugh, J. L., Wright, S., & Nessler, C. (2012). Modified Response Elaboration Training: A systematic extension with replications. *Aphasiology*, *26*(12), 1407-1439.
- Wambaugh, J. L., Wright, S., Nessler, C., & Mauszycki, S. C. (2014). Combined Aphasia and Apraxia of Speech Treatment (CAAST): effects of a novel therapy. *Journal of Speech, Language, & Hearing Research*, *57*(6), 2191-207.
- Wan, C. Y., Zheng, X., Marchina, S., Norton, A., & Schlaug, G. (2014). Intensive therapy induces contralateral white matter changes in chronic stroke patients with Broca's aphasia. *Brain & Language*, *136*, 1-7.
- Webster, J., & Gordon, B. (2009). Contrasting therapy effects for verb and sentence processing difficulties: A discussion of what worked and why. *Aphasiology*, *23*(10), 1231-1251.
- Webster, J., Morris, J., Connor, C., Horner, R., McCormac, C., & Potts, A. (2013). Text level reading comprehension in aphasia: What do we know about therapy and what do we need to know? *Aphasiology*, *27*(11), 1362-1380.

- Weill-Chounlamounry, A., Capelle, N., Tessier, C., & Pradat-Diehl, P. (2013). Multimodal therapy of word retrieval disorder due to phonological encoding dysfunction. *Brain Injury, 27*(5), 620-31.
- Whitworth, A., Leitão, S., Cartwright, J., Webster, J., Hankey, G. J., Zach, J., Howard, D., & Wolz, V. (2015). NARNIA: a new twist to an old tale. A pilot RCT to evaluate a multilevel approach to improving discourse in aphasia. *Aphasiology, 29*(11), 1345-1382.
- Whitworth, A., Webster, J., & Howard, D. (2015). Argument structure deficit in aphasia: it's not all about verbs. *Aphasiology, 29*(12), 1426-1447.
- Wieczorek, R., Huber, W., & Darkow, R. (2011). Tense/aspect category in fluent and nonfluent German aphasia: An experimental training programme for verb production. *Aphasiology, 25*(8), 851-871.
- Wilkinson, R., Bryan, K., Lock, S., & Sage, K. (2010). Implementing and evaluating aphasia therapy targeted at couples' conversations: A single case study. *Aphasiology, 24*(6-8), 869-886.
- Wilssens, I., Vandenborre, D., van Dun, K., Verhoeven, J., Visch-Brink, E., & Marien, P. (2015). Constraint-induced aphasia therapy versus intensive semantic treatment in fluent aphasia. *American Journal of Speech-Language Pathology, 24*(2), 281-94.
- Woldag, H., Voigt, N., Bley, M., & Hummelsheim, H. (2017). Constraint-Induced Aphasia Therapy in the Acute Stage: What Is the Key Factor for Efficacy? A Randomized Controlled Study. *Neurorehabilitation & Neural Repair, 31*(1), 72-80.
- Woolf, C., Cauté, A., Haigh, Z., Galliers, J., Wilson, S., Kessie, A., Hirani, S., Hegarty, B., & Marshall, J. (2016). A comparison of remote therapy, face to face therapy and an attention control intervention for people with aphasia: a quasi-randomised controlled feasibility study. *Clinical Rehabilitation, 30*(4), 359-73.
- Woolf, C., Panton, A., Rosen, S., Best, W., & Marshall, J. (2014). Therapy for auditory processing impairment in aphasia: An evaluation of two approaches. *Aphasiology, 28*(12), 1481-1505.
- Yeung, O., & Law, S. P. (2010). Executive functions and aphasia treatment outcomes: data from an ortho-phonological cueing therapy for anomia in Chinese. *International Journal of Speech-language Pathology, 12*(6), 529-44.
- Zakarias, L., Keresztes, A., Marton, K., & Wartenburger, I. (2018). Positive effects of a computerised working memory and executive function training on sentence comprehension in aphasia. *Neuropsychological Rehabilitation, 28*(3), 369-386.
- Zakariás, L., Salis, C., & Wartenburger, I. (2018). Transfer effects on spoken sentence comprehension and functional communication after working memory training in stroke aphasia. *Journal of Neurolinguistics, 48*, 47-63.
- Zannino, G. D., Barban, F., Caltagirone, C., & Carlesimo, G. A. (2017). Exploring classical conditioning for strengthening the links between semantic and lexical representations in pure anomia: Preliminary findings from a single case study. *Journal of Neuropsychology, 11*(1), 91-107.
- Zannino, G. D., Zabberoni, S., Murolo, R., Caltagirone, C., & Carlesimo, G. A. (2019). Picture and spoken word presentation in repetition training for anomia: does stimulus order matter? Evidence obtained from 12 individuals with chronic aphasia using a computer-based telemedicine approach. *Aphasiology*. Advance online publication. <https://doi.org/10.1080/02687038.2018.1563876>
- Zettin, M., Leopizzi, M., & Galetto, V. (2019). How does language change after an intensive treatment on imitation? *Neuropsychological Rehabilitation, 29*(9), 1332-1358.
- Zhang, H., Li, H., Li, R., Xu, G., & Li, Z. (2019). Therapeutic effect of gradual attention training on language function in patients with post-stroke aphasia: a pilot study. *Clinical Rehabilitation, 33*(11), 1767-1774.
- Zipse, L., Norton, A., Marchina, S., & Schlaug, G. (2012). When right is all that is left: plasticity of right-hemisphere tracts in a young aphasic patient. *Annals of the New York Academy of Sciences, 1252*, 237-45.
- Zumbansen, A., Peretz, I., & Hebert, S. (2014). The Combination of Rhythm and Pitch Can Account for the Beneficial Effect of Melodic Intonation Therapy on Connected Speech Improvements in Broca's Aphasia. *Frontiers in Human Neuroscience, 8*, 592.
